# Supplementary material for: Process evaluation of fidelity and costs of implementing the Integrated Chronic Disease Management model in South Africa: mixed methods study protocol
Source: PubMed Central journal article supplement — BMJ Open. 2019 Jun 3;9(6):e029277. doi: 10.1136/bmjopen-2019-029277 (PMC6561456; doi:10.1136/bmjopen-2019-029277), 2019-06-03
Supplement: bmjopen-2019-029277.draft_revisions.pdf [file bmjopen-2019-029277.draft_revisions.pdf]

# BMJ Open

BMJ Open is committed to open peer review. As part of this commitment we make the peer review history of every article we publish publicly available.

When an article is published we post the peer reviewers' comments and the authors' responses online. We also post the versions of the paper that were used during peer review. These are the versions that the peer review comments apply to.

The versions of the paper that follow are the versions that were submitted during the peer review process. They are not the versions of record or the final published versions. They should not be cited or distributed as the published version of this manuscript.

BMJ Open is an open access journal and the full, final, typeset and author-corrected version of record of the manuscript is available on our site with no access controls, subscription charges or pay-per-view fees (<http://bmjopen.bmj.com>).

If you have any questions on BMJ Open's open peer review process please email [info.bmjopen@bmj.com](mailto:info.bmjopen@bmj.com)

# BMJ Open

## Process evaluation of Fidelity and Costs of implementing the Integrated Chronic Disease Management Model in South Africa: Mixed Methods study

|                               |                                                                                                                                                                                                                                                                                                                                                                                                                             |
|-------------------------------|-----------------------------------------------------------------------------------------------------------------------------------------------------------------------------------------------------------------------------------------------------------------------------------------------------------------------------------------------------------------------------------------------------------------------------|
| Journal:                      | <i>BMJ Open</i>                                                                                                                                                                                                                                                                                                                                                                                                             |
| Manuscript ID                 | bmjopen-2019-029277                                                                                                                                                                                                                                                                                                                                                                                                         |
| Article Type:                 | Protocol                                                                                                                                                                                                                                                                                                                                                                                                                    |
| Date Submitted by the Author: | 22-Jan-2019                                                                                                                                                                                                                                                                                                                                                                                                                 |
| Complete List of Authors:     | Lebina, Limakatso; MRC Soweto Matlosana Collaborating Centre for HIV/AIDS and TB, Perinatal HIV Research Unit (PHRU)<br>Alaba, Olufunke; University of Cape Town, School of Public Health and Family Medicine<br>Kawonga, Mary; University of the Witwatersrand, School of Public Health<br>Oni, Tolu; University of Cape Town, School of Public Health and Family Medicine; University of Cambridge, MRC Epidemiology Unit |
| Keywords:                     | implement, ICDM, intervention evaluation                                                                                                                                                                                                                                                                                                                                                                                    |
|                               |                                                                                                                                                                                                                                                                                                                                                                                                                             |

SCHOLARONE™  
Manuscripts

1  
2  
3 Protocol

4 **Process evaluation of Fidelity and Costs of implementing the Integrated**  
5 **Chronic Disease Management Model in South Africa: Mixed Methods study**  
6  
7

8 Version 1.0, Dated 18 January 2018  
9

10 1. Limakatso Lebina (MBCChB, MPH)\* (Corresponding author)

11 Affiliations:

12 Perinatal HIV Research Unit (PHRU), SA MRC Soweto Matlosana Collaborating  
13 Centre for HIV/AIDS and TB, Faculty of Health Sciences, University of the  
14 Witwatersrand, Johannesburg, South Africa;

15 School of Public Health and Family Medicine, University of Cape Town

16 Email: lebinal@phru.co.za  
17

18 2. Olufunke A. Alaba (BSc, MSc, PhD)

19 Affiliation: School of Public Health and Family Medicine, University of Cape Town

20 Email: olufunke.alaba@uct.ac.za  
21

22 3. Mary Kawonga (BSc, MBCChB, DipHSM, PhD)

23 Affiliation: School of Public Health, University of the Witwatersrand

24 Email: Mary.Kawonga@wits.ac.za  
25

26 4. Tolu Oni (MBBS, MRCP, MPH, FCPHM, MD(Res))

27 Affiliation: School of Public Health and Family Medicine, University of Cape Town;  
28 MRC Epidemiology Unit, University of Cambridge

29 Email: Tolu.Oni@mrc-epid.cam.ac.uk  
30  
31  
32  
33

34 Keywords: implementation, ICDM model, intervention evaluation  
35  
36  
37  
38  
39  
40  
41  
42  
43  
44  
45  
46  
47  
48  
49  
50  
51  
52  
53  
54  
55  
56  
57  
58  
59  
60

## Abstract

**Introduction:** The South African Department of health has developed and implemented the Integrated Chronic Disease Management (ICDM) model to respond to the increased utilization of primary healthcare (PHC) services due to a surge of non-communicable diseases co-existing with a high prevalence of communicable diseases. However some of the expected outcomes on implementing the ICDM model have not been achieved. The aims of this study are to assess if the observed sub-optimal outcomes of the ICDM model implementation are due to lack of fidelity to the ICDM model; to examine the contextual factors associated with the implementation fidelity, and to calculate implementation costs.

**Methods and Analysis:** A process evaluation, mixed methods study in sixteen pilot clinics from two health districts to assess the degree of fidelity to four major components of the ICDM model. Activity scores will be summed per component and overall fidelity score will be calculated by summing the various component scores, and compared between components, facilities and districts. Multivariate analysis will be used to examine the association between contextual factors and the degree of fidelity, individual and team characteristics, facility features and organizational culture indicators will be included in the regression. Health system financial and economic costs of implementing the four components of the ICDM model will be calculated using an ingredient approach. The unit of implementation costs will be by activity of each of the major components of the ICDM model. Sensitivity analysis will be carried out using clinic size, degree of fidelity, and different inflation situations.

**Ethics and Dissemination:** The protocol has been approved by the University of Cape Town and University of the Witwatersrand Human Research ethics committees. The results of the study will be shared with the department of health, participating health facilities and the through scientific publications and conference presentations.

### Strengths and Limitations of this study

- This study uses implementation research principles to provide data on the degree of fidelity to the ICDM model for optimizing the model
- Process evaluation will provide an indication of how the ICDM model has been modified in different contexts can explain variability in the implementation outcomes.
- Implementation costs assessments are essential in public health programs to inform resource allocation during planning and budgeting and to inform economic evaluations
- The reliance on the service provider to accurately provide information on the implementation activities or insufficiencies of those activities is a limitation of this study.
- The results of this study could be applied to clinics similar in size or patient load but may not be representative of all districts in the country.

## Background

Chronic diseases and multi-morbidity is increasing in developing countries due to epidemiological transition of increasing prevalence of non-communicable diseases (NCDs) in the presence of rampant infectious diseases<sup>6,7</sup>. By 2025, it is estimated that the burden of NCDs in sub-Saharan Africa will be higher than that of communicable diseases (CD)<sup>8</sup>. The increase in urbanization, economic development, aging, decrease of physical activity and poor dietary options are some of the contributing factors to the increasing prevalence of NCDs in developing countries<sup>9,10</sup>. There is also a complex interaction of risk factors, management and health outcomes between NCDs and CDs, resulting a rise in chronic disease mult morbidity<sup>11,12</sup>. Multi-morbidity often results in reduced levels of physical capability, high rates of health services utilization and attendant costs and higher mortality rates<sup>13,14</sup>. The double burden (NCDs and CDs) of diseases is costly to the health systems (increased utilization, medication), the economies, households and individuals<sup>7</sup>. Therefore, chronic disease management needs to be comprehensive and take into consideration these interactions in disease prevention, management and control.

In South Africa, the current leading health problems are NCDs, accounting for 51.3% of all deaths, followed by CDs 38.4%, and injuries 10.3%<sup>15</sup>. South Africa like many Sub-Saharan African countries has been severely affected by the HIV/AIDS epidemic, with 7.1 million people living with HIV; and 18.9% of people between the ages of 15-49years being HIV infected<sup>16</sup>. As a result, there is an increase in the prevalence of multi-morbidity<sup>17</sup>. Tuberculosis (TB), Human Immune Deficiency Syndrome (HIV) and NCDs (mainly Hypertension (HPT) and Diabetes Mellitus (DM) ) account for 45% of all primary health care consultations, with a multi-morbidity prevalence of 22.6%<sup>9,18</sup>.

Unresponsive health systems often provide services that are not aligned with the health requirements of the population being served<sup>19</sup>. A more comprehensive chronic disease management model, combining both CDs and NCDs that reduces health utilization and promotes self-management is one of the strategies that have been recommended to address the challenges associated with the management of multimorbid chronic diseases<sup>7,19</sup>. The chronic care model (CCM) and Innovative Care for Chronic Conditions (ICCC) framework have been recommended as health system

1  
2  
3 approaches to deal with multi-morbidity<sup>20</sup>. However, there have been significant  
4 resources and strategies allocated to the implementation of HIV programs and  
5 consequently the non-communicable chronic diseases have been overlooked. To  
6 rectify this imbalance, the South African National Department of Health developed and  
7 has begun implementation of the Integrated Chronic Disease Management (ICDM)  
8 model in order to improve efficiencies and quality of care primary health care clinics  
9 for patients with chronic diseases<sup>21</sup>.  
10  
11  
12  
13  
14  
15  
16

### 17 **Integrated Chronic Disease Management Model**

18  
19  
20 The ICDM model was piloted from 2011 in 42 clinics from three health districts in three  
21 different provinces (Figure 1) of South Africa as follows: West Rand in Gauteng  
22 Province, Bushbuckridge in Mpumalanga and Dr. Kenneth Kaunda in North West  
23 Province<sup>22,1</sup>. As part of a broader national approach to revitalize primary health care  
24 (PHC) services, the “ideal clinic” initiative was also started in 2013<sup>23</sup>. The principles of  
25 the “ideal clinic” incorporate the majority of the activities required for ICDM  
26 implementation and additionally provides a comprehensive, systematic process of  
27 transforming all PHC facilities to conform to the National Health Insurance (NHI)  
28 standards<sup>23</sup>. The envisaged “ideal clinic” benchmarks include functional infrastructure  
29 and equipment, adequate personnel and medicines and supplies, good administrative  
30 processes and the use of applicable protocols and guidelines in diseases  
31 management<sup>23</sup>. The principles of the ICDM model cover integration of services, facility  
32 improvement, use of ward-based PHC outreach teams and ensuring adequate levels  
33 of medicines and supplies<sup>23</sup>.  
34  
35  
36  
37  
38  
39  
40  
41  
42  
43  
44  
45

46 The four major components (action points) of the ICDM implementation are: facility re-  
47 organization for efficiency, clinical supportive management, assisted self-support and  
48 strengthening of support systems (Figure 2)<sup>21</sup>. The ICDM priority and core standards  
49 are 1) improving the values and attitudes of staff, 2) patient safety and security and  
50 infection prevention and control, and 3) availability of medicines and supplies<sup>21</sup>.  
51 Assuming full implementation of the ICDM as recommended, the expected outcomes  
52 include improved operational efficiency and quality of care, improved individual  
53 responsibility towards their health and an activated and informed community<sup>21</sup>. The  
54 ICDM model also provides guidelines on booking systems for patients with chronic  
55  
56  
57  
58  
59  
60

1  
2  
3 diseases, clinic flow, organization of waiting areas and consultation rooms and  
4 dispensing medication practices that promote adherence and minimize medication  
5 shortages. In order to avoid fragmentation of services, the ICDM recommends a multi-  
6 disciplinary treating team to provide care to all patients with chronic illnesses and be  
7 trained on how to assess and manage drug-drug interactions and disease interactions.  
8 Mentoring, supervision and training of the PHC nurses to be provided the district  
9 Clinical Specialist Team (DCST)<sup>21</sup>. The DCST other responsibilities include  
10 monitoring of patient clinical outcomes through clinical audits and strengthening of  
11 referral systems for complicated patients<sup>21</sup>. The components or building blocks for  
12 ICDM model include human resources, health information, mobile technology,  
13 equipment and pharmaceutical supply and management<sup>21</sup>.  
14  
15  
16  
17  
18  
19  
20  
21  
22  
23

24 The pilot phase was supported with quality improvement reviews and consultation with  
25 all staff members at the facility-, district- and province-levels to refine the model even  
26 further<sup>1</sup>. Some of the implementation challenges identified in these consultations were  
27 lack of key equipment, an emphasis on curative health services with minimal focus on  
28 prevention, the ill-defined role of community health care workers and delayed  
29 formation of out of facility chronic medication collection sites<sup>1</sup>. Lack for these  
30 necessary building blocks for the ICDM model has resulted in the implementation of  
31 hybrids of the original model<sup>1</sup>. The limitations of the ICDM model identified include its  
32 focus on secondary and tertiary prevention of disease within the healthcare facilities,  
33 and the lack of guidelines on social and environmental changes for the prevention of  
34 risk factors and onset of chronic diseases<sup>21</sup>. Furthermore, population level and  
35 community level interventions are only vaguely described, and the collaborations  
36 required with other sectors for policy development and implementing supportive  
37 provisions is not accentuated.  
38  
39  
40  
41  
42  
43  
44  
45  
46  
47  
48  
49

### 50 **Management of Chronic Conditions in PHC Facilities**

51 An evaluation of PHC services in South Africa showed low rates of diagnosis for  
52 chronic diseases, and the few that are diagnosed, are not managed appropriately and  
53 do not achieve the treatment targets<sup>24,25</sup>. The lack of key equipment in PHC clinics to  
54 diagnose and monitor total cholesterol, blood pressure and blood glucose contribute  
55 these challenges, with patients reporting the need to travel to higher levels of care to  
56 access certain medication and diagnostic tests<sup>24</sup>. Additional barriers included the  
57  
58  
59  
60



1  
2  
3 insufficient consultation time that patients report with their healthcare providers even  
4 after long waiting periods at the facility due to high volumes of patients<sup>24</sup>; poor  
5 knowledge on chronic disease, shortage of medication and shortage of healthcare  
6 workers resulting in long waiting periods at PHC clinics<sup>26</sup>. The nurses knowledge of  
7 chronic diseases was also found to be poor due to inadequate training, unavailability  
8 of guidelines and lack of supervision<sup>26</sup>.  
9  
10  
11  
12  
13  
14

15 The observed impact of the ICDM model in the management of chronic diseases has  
16 been an improvement in the patients' records and compliance with clinical guidelines  
17 for hypertension, diabetes and HIV<sup>2</sup>. The ICDM model was also shown to be effective  
18 in improving control of HIV, but no significant improvements for patients on  
19 hypertension treatment<sup>3</sup>. One possible explanation for this finding is that the ICDM  
20 model had not successfully leveraged the HIV program to enhance service delivery  
21 for NCDs like hypertension<sup>3</sup>. The patients receiving care at the ICDM clinics were  
22 concerned with the irregular supplies and stock-outs of hypertension medication,  
23 which affected their treatment adherence<sup>4</sup>. The patients' perspectives on the ICDM  
24 model inconveniences were a non-flexible appointment system that affected access  
25 to services, long waiting times because of personnel shortages and stigmatization of  
26 patients that are visited by community healthcare workers<sup>4</sup>.  
27  
28  
29  
30  
31  
32  
33  
34  
35  
36  
37

38 Although monitoring and evaluation tools exist for the ICDM model implementation,  
39 they do not provide data on implementation outcomes such as adoption, fidelity,  
40 penetration, acceptability, sustainability and costs. The implementation of an  
41 innovative intervention can be affected by the design of the intervention, context and  
42 or implementation outcomes<sup>27</sup>. New innovative interventions could fail to achieve  
43 intended objectives because of implementation barriers or failures in the design<sup>27</sup>.  
44 Failure of the ICDM to achieve some of the expected outcomes has been described<sup>4</sup>.  
45 However, it is not clear whether these observed and perceived gains and  
46 shortcomings are as a result of the inherent faults in the design of the model or failure  
47 to adhere to the prescribed activities and/or the impact of contextual factors. The  
48 successful implementation of the ICDM model requires a high degree of fidelity to the  
49 recommended processes of delivering health care services with clear intervention  
50 priorities and expected outcomes<sup>5,28</sup>. Process evaluation of the ICDM model  
51 implementation would optimize practice of the four major components and scale-up of  
52  
53  
54  
55  
56  
57  
58  
59  
60

1  
2  
3 the model, and the quality of care for individuals affected by chronic illness, especially  
4 those with multi-morbidity.  
5

6 Implementation of any intervention within a large complex health system is generally  
7 unpredictable. An assessment of fidelity on the implementation of the model will  
8 additionally measure quality of practice for continuous improvement, identify any  
9 innovations that can improve models' processes and support systematic  
10 implementation of the model. Interviews with the actors in the ICDM model  
11 implementation will provide information on their perceptions and experiences with  
12 implementation and how contextual factors have affected fidelity to the model's  
13 guidelines. This can improve comparability, generalizability and replicability of the  
14 results of this study. Assessing the cost of implementing the various activities of the  
15 ICDM model will then assist with planning and budgeting, as well as inform scalability  
16 and sustainability of the model  
17  
18  
19  
20  
21  
22  
23  
24  
25

26  
27 Therefore, the **aim** of this study is to evaluate selected implementation outcomes of  
28 the ICDM model: fidelity and implementation costs, and to assess the influence of  
29 contextual factors on ICDM model implementation fidelity in two health districts where  
30 the ICDM has been piloted, from two different provinces in order to better understand  
31 the processes of successful implementation of the ICDM model and how the model  
32 can be optimized. The **objectives** of the study are:  
33  
34  
35

- 36 1. To assess the degree of fidelity in the implementation of the ICDM model
- 37 2. To evaluate the influence of contextual factors on the implementation fidelity of the  
38 ICDM model
- 39 3. To estimate the implementation costs of the ICDM model  
40  
41  
42  
43  
44  
45  
46

## 47 **Methods and Analysis**

### 48 **Setting**

49  
50 The National Department of Health (DOH), is divided into 52 districts across nine  
51 provinces and has decentralized the responsibility for health service delivery to  
52 provincial governments and district health management teams<sup>23, 29</sup>. The majority of  
53 the population (80%) utilize overstretched state facilities where most healthcare  
54 services are free or at low cost, yet only 30% of doctors work in the public sector<sup>30, 31</sup>.  
55 PHC clinics are the first contact, and provide acute and chronic care, and preventative  
56  
57  
58  
59  
60

1  
2  
3 and curative services. A team of healthcare workers at a PHC clinic or a community  
4 health centre usually includes nurses, a doctor, a social worker, a pharmacist, health  
5 promoters and administration personnel. Each healthcare facility or clinic in South  
6 Africa services a population of between 2000 to 20 000<sup>1</sup>. Although there has been  
7 some progress in revitalizing PHC, personnel shortages, the HIV/AIDS epidemic and  
8 fragmentation of services continue to undermine these gains especially in rural  
9 areas<sup>32</sup>. Subsequently, there is a plan to introduce more regulation and reduce  
10 commercialization through the National Health Insurance (NHI)<sup>31, 33</sup>. Additional  
11 objectives of the NHI are to revamp the 3500 primary health care facilities in the  
12 country, as well as reinforcing the community healthcare workers program,  
13 environmental health and school health services<sup>23</sup>.

24 This study will be conducted in two health districts (Dr. Kenneth Kaunda in North West  
25 Province and West Rand District in Gauteng) that were the pilot sites for the ICDM  
26 model implementation. Both districts are within socio-economic quantile four (1 is most  
27 deprived and 5 is least deprived), however comparing the North West to Gauteng  
28 province, poverty prevalence (33% vs. 27%) and informal housing ( 21% vs. 19%) are  
29 slightly higher in the North West Province<sup>34, 35</sup>. The provincial HIV prevalence is 13.3%  
30 in North West Province and 12.4% in Gauteng<sup>36</sup>. The prevalence of hypertension is  
31 high (31%- 39.7%) in both districts, a reflection of large number of people accessing  
32 health services for chronic NCD<sup>34</sup>. The prevalence of diabetes in South Africa is 8.27%  
33 (2.6 million), and 31.9% among adults (20-79 years) with 1.2 million people with  
34 diabetes estimated to be undiagnosed<sup>37</sup>.

## 35 **Theoretical Framework**

### 36 *Process Evaluation of Complex Interventions*

37 Process evaluation frameworks assist in understanding the functioning of a complex  
38 intervention by reviewing implementation processes and the influence of contextual  
39 factors<sup>38,39</sup>. A complex intervention implementation process has multiple components  
40 which interact to produce change, and or are difficult to implement and or target a  
41 number of organizational levels<sup>38,40</sup>. Process evaluation is therefore useful for  
42 assessing (Figure 2) fidelity (dose, adaptations, frequency and reach), clarifying the  
43 usual mechanisms and processes and identifying the impact of contextual factors on  
44  
45  
46  
47  
48  
49  
50  
51  
52  
53  
54  
55  
56  
57  
58  
59  
60

1  
2  
3 the variations in processes and outcomes<sup>41</sup>. A process evaluation framework will be  
4 applied in this study to evaluate whether the processes for implementing the  
5 intervention (the ICDM model) is being applied as intended according to the design  
6 (fidelity) of the intervention, and how contextual factors influence the implementation  
7 fidelity (Figure 3). The costs, quantity and quality of program activities provided and  
8 evaluating the generalizability of the results in other different contexts is important  
9 especially for a program that is already established<sup>41</sup>.  
10  
11  
12  
13  
14  
15  
16

## 17 **Study Design**

18 This is a process evaluation study using mixed methods to assess the degree of  
19 fidelity, costs and impact of context on the implementation fidelity of the ICDM model.  
20  
21  
22  
23

## 24 **Objective-specific methodology**

25 **Fidelity assessment** will be carried out to review if implementation of the ICDM model  
26 adheres to content, coverage, frequency and duration as prescribed in the ICDM  
27 model manual in sixteen (8 in North West and 8 in Gauteng) clinics. As there are no  
28 fidelity criteria in the literature that are suitable to adapt for assessing the ICDM model  
29 implementation, fidelity criteria have been developed based on the ICDM model  
30 guidelines<sup>21</sup>, the quarterly ICDM model progress monitoring tool and published  
31 literature on the ICDM model<sup>1, 3, 4, 28</sup>. The basis of the criteria are the four (facility re-  
32 organization, clinical supportive management, assisted self-management and  
33 strengthening of the support systems) major components of the ICDM model<sup>21</sup>. The  
34 outlined prescribed activities are the variables to be assessed on the implementation  
35 fidelity criteria. The expected outcome of the fidelity criteria is to warrant that all the  
36 essential activities required for successful implementation of the ICDM model have  
37 been captured. Each criterion under the four major components will be listed as an  
38 item to be scored on the fidelity criteria. The fidelity criteria will be assessed on a pilot  
39 study, and finalized on the basis of the results of the pilot study. The twenty ICDM pilot  
40 clinics located in those districts will be considered for inclusion if the clinic has been  
41 open and running without any major interruptions (renovations, closures) in the last two  
42 years. At each clinic, data will be collected by structured observations, review of  
43 facility records and interviews with the healthcare workers.  
44  
45  
46  
47  
48  
49  
50  
51  
52  
53  
54  
55  
56  
57  
58  
59  
60

1  
2  
3 **Contextual factors** (facility characteristics and characteristics of individuals and  
4 teams) on fidelity will be examined in four clinics. Based on the degree of fidelity, **two**  
5 **clinics**, one with a high, one with a low degree of fidelity will be selected each of the  
6 two districts. The organizational contextual factors to be considered include  
7 communication style, decision process and culture<sup>42</sup>. Individual level data for the  
8 implementing teams will include demographics (age, gender, race, education level),  
9 position role within the clinic, years in that role, their participation in the delivery of the  
10 ICDM model. External (to the facility) context factors (socio-economic level, policies  
11 and legislation) will not be evaluated in order to keep the study scope manageable.  
12 Mixed-methods (interviews, facility assessments and culture surveys) approach on  
13 assessing the influence of context on implementation fidelity will be used to allow co-  
14 information. The qualitative interviews will be conducted with thirty healthcare workers,  
15 purposively selected to represent different cadres of staff members that implement  
16 and manage the ICDM model intervention for more than six months. The interviews  
17 will be done on a one-to-one basis to minimize having group dynamics.

18  
19  
20  
21  
22  
23  
24  
25  
26  
27  
28  
29  
30  
31 Participants' confidentiality will be protected at all times during the study and no  
32 electronic record will contain individual identifiers. A master list that contains the  
33 participants' identifiers will be kept in a separate lockable area. The results will also  
34 be presented in such a way that respondents cannot be identified.

35  
36  
37  
38  
39 **Costs** (financial and economic) of implementing the ICDM model from the health  
40 system perspective will be evaluated in the same four clinics. The health system  
41 implementation costs are an all-inclusive costing valuation that considers costs  
42 incurred by the providers of the service<sup>72</sup>. Assessing the implementation costs will be  
43 a partial economic evaluation as it will only focus on the costs of implementation and  
44 not the outcomes. The unit of implementation costs will be by activity of each of the  
45 major components of the ICDM model. Service level costs such as those pertaining to  
46 the development of the ICDM model will not be included as these costs were incurred  
47 in 2010/11 . The focus will be on post start-up annual costs required for the full  
48 implementation of the ICDM model in a typical year. Both direct and indirect, and fixed  
49 and recurrent costs will be calculated.

1  
2  
3 Annualized equipment and capital costs will be calculated according to the volume  
4 being used for the ICDM model. Estimating annual costs will include adding up the  
5 acquisition, operation, maintenance and disposal costs. In the financial documents  
6 review, key input costs that will be checked and categorized include human resources,  
7 office supplies and travel. Based on the useful life and the discount rate, an  
8 appropriate annualization factor will be determined. If there are any donations for  
9 program implementation (volunteers, healthcare workers not allocated to ICDM but  
10 assisting in service delivery, donated equipment or office supplies) they will be  
11 included. Medical and support staff labour costs will be calculated based on the full  
12 time equivalent, duration of involvement in the ICDM model implementation and the  
13 gross salary of the personnel. A proportion of overhead costs of running the health  
14 facility like electricity, rent, water will be included in the implementation costs.  
15 Administrative costs at district and provincial level (which are beyond the facility) will  
16 not be included in the analysis.  
17  
18  
19  
20  
21  
22  
23  
24  
25  
26  
27  
28

29 *Patient and Public Involvement:* Previous research has shown that patients do not like  
30 some of the components of the ICDM model and that was the basis of the research  
31 question. Patients will not be enrolled in the study, however results will be shared with  
32 them through community and health facilities leadership.  
33  
34  
35  
36  
37

### 38 **Data Management and Analysis Plan**

39 The data will be collected using paper based questionnaires and later captured into  
40 an electronic database. There will be no identifying features (e.g. date of birth,  
41 addresses) in the database. The health facilities and healthcare workers that  
42 participated will be allocated a study number. Source documents will be safely kept  
43 and only accessible to study personnel. The data on costs will be manually entered  
44 into the CostIt software 2007<sup>43</sup> according to the provided major categories. CostIt  
45 software is a template designed to capture and automatically analyse cost data for  
46 different (hospital, PHC and programme) levels of the healthcare system<sup>43</sup>  
47  
48  
49  
50  
51  
52  
53  
54

55 Descriptive statistics (frequency, median, interquartile ranges, percentages) will be  
56 used to examine the general quantitative variables of the clinics, such as size, number  
57 of chronic patients, services offered, clinic team characteristics and overall functioning  
58 status. Following the evaluation, each clinic will receive a score for each of the fidelity  
59  
60

1  
2  
3 criteria items. Item scores will be summed per component to give four overall ICDM  
4 component fidelity scores per facility. An overall ICDM model implementation fidelity  
5 score will be calculated per facility by summing the four component scores. The  
6 implementation fidelity scores will be summarized using descriptive statistics and  
7 compared between components, facilities and districts. The outcome of interest will be  
8 the degree of implementation fidelity.  
9  
10  
11  
12  
13  
14

15 The experiences and perceptions of the healthcare workers from the interviews will  
16 be analysed with REDCap software for Linkert scaled questions and using thematic  
17 content analysis for barriers and facilitators of implementation fidelity for qualitative  
18 data. The six steps recommended by Braun and Clarke<sup>44</sup> for thematic content analysis  
19 that will be followed: Familiarization, generating initial codes, searching for themes  
20 throughout the database, reviewing and naming themes and summarizing the  
21 findings<sup>44</sup>. Multi-variate analysis using STATA 14 econometric software will be used  
22 to assess the effect of various contextual factors on the implementation fidelity of the  
23 ICDM model. The impact of both the organizational (case mix, financial flexibility and  
24 culture) and implementing teams (work experience, cadre of HCW, training and  
25 perceptions of ICDM) level factors on the degree of the ICDM model implementation  
26 fidelity will be assessed. The initial analysis will include description of the sample,  
27 followed by a bivariate analysis that includes t-tests and ANOVA to examine the  
28 influence of contextual factors on implementation fidelity of the ICDM model.  
29  
30  
31  
32  
33  
34  
35  
36  
37  
38  
39  
40

41 Costs: Capital costs and other costs that have a life span of several years will be  
42 annualized over the useful lifespan to get the equivalent annual costs. All costs will be  
43 adjusted for inflation and discount. Equipment will be depreciated according to the  
44 South African Accounting principles<sup>45</sup>. Sensitivity analyses will be conducted for other  
45 possible variations in estimated costs. Sensitivity analyses will also be carried out to  
46 explore different scenarios including size of clinic, degree of implementation fidelity  
47 and other factors that could possibly affect costs based on literature.  
48  
49  
50  
51  
52  
53  
54

55 *Ethical conduct of the study:* This study has been approved by the University of Cape  
56 Town (Ref: 127/2018) and University of the Witwatersrand (Ref: R14/49) Human  
57 Research ethics committees. Approvals have also been received from the Gauteng  
58  
59  
60

1  
2  
3 and the North West Provincial departments of health. The participants for the  
4 interviews will be consented individually prior to taking part in the study.  
5

6 *Results Dissemination:* The results of this study will be shared with the various  
7 stakeholders to inform the implementation of the ICDM model in South Africa and other  
8 models of integrated care. Brief summary of results will be presented to the Provincial  
9 and districts DOH. The full results will be presented at local research days in each  
10 province and district. Facility managers and local clinic staff that participated in the  
11 study will be given feedback on the outcomes of the study. The results will also be  
12 presented through publications and conference presentations to enhance scientific  
13 knowledge. Authorship will be determined by substantial contributions to the study  
14 according to the recommendations for the conduct, reporting and publication of  
15 research in medical journals. Once the data collection and cleaning is complete, it will  
16 be made open and publicly accessible.  
17  
18  
19  
20  
21  
22  
23  
24  
25  
26  
27

28 **Conclusion:** Many health systems are challenged with increased demand for  
29 healthcare for chronic diseases. Despite this service need, there is minimal integration  
30 of services for the management of chronic diseases resulting in inefficiencies in  
31 service delivery, high costs and poor health outcomes. The ICDM model has been  
32 developed to address this challenge, the success of which will be influenced by the  
33 degree to which the model is accurately implemented. This highlights the need for data  
34 to assess the degree of fidelity to the ICDM model intervention, and for data that  
35 explores how fidelity of implementation is affected by contextual factors. Data  
36 generated from this study will inform integration of chronic care services at the PHC  
37 level, and scalability of the ICDM model, of relevance in South Africa and other low  
38 and middle-income countries increasingly facing a growing tide of chronic disease  
39 multimorbidity.  
40  
41  
42  
43  
44  
45  
46  
47  
48  
49  
50  
51  
52  
53  
54  
55  
56  
57  
58  
59  
60



## References

1. Mahomed OH, Asmall S, J. Development and implementation of an integrated chronic disease model in South Africa: lessons in the management of change through improving the quality of clinical practice. *Int J of Integr Care* 2015; 15
2. Mahomed OH, Naidoo S, Asmall S, Taylor M. Improving the quality of nurse clinical documentation for chronic patients at primary care clinics: A multifaceted intervention. *Curationis*. 2015; 38.
3. Ameh S, Klipstein-Grobusch K, D'Ambruso L, Kahn K, Tollman SM, Gómez-Olivé X. Effectiveness of an integrated chronic disease management model in improving patients' CD4 count and blood pressure in a rural South African setting: a controlled interrupted time series analysis. 21st International AIDS Conference; Durban South Africa 2016.
4. Ameh S, Klipstein-Grobusch K, D'Ambruso L, Kahn K, Tollman SM, Gómez-Olivé X. Quality of integrated chronic disease care in rural South Africa: User and provider perspective. 21st International AIDS Conference; Durban South Africa 2016.
5. Carroll C., Patterson M., Wood S., Booth A., Rick J., Balain S. A conceptual framework for implementation fidelity. *Implement Sci* 2007; 2
6. Kim DJ., Westfall AO., Chamot E. Multimorbidity patterns in HIV-infected patients: the role of obesity in chronic disease clustering. *Immune Defic Syndr* 2012; 61:600-5.
7. The World Bank. Human Development Network. The growing danger of non-communicable diseases. Acting now to reverse course. 2011.
8. Mbanya J., Ramiya K. Diabetes Mellitus. In: Jamison D. T., Feachem R. G., Makgoba M. W., editors. *Disease and Mortality in Sub-Saharan Africa*. Washington DC: World Bank; 2006.
9. Vorster HH., Venter CS., Wissing MP., Margetts BM. The nutrition and health transition in the North West Province of South Africa: a review of the THUSA study. *Publ Health Nutr* 2005; 8:480 -90.
10. Steyn K., Kazenellenbogen JM., Lombard CJ., Bourne LT. Urbanization and the risk for chronic diseases of lifestyle in the black population of the Cape Peninsula, South Africa. *J Cardiovasc Risk* 1997; 4:135 - 42.
11. Oni T, Unwin N. Why the communicable/non-communicable disease dichotomy is problematic for public health control strategies: implications of multimorbidity for health systems in an era of health transition. *International Health* 2015.
12. Bertram MY., Jaswal AV., Wyk VP., Levitte NS., Hofman KJ. The non-fatal disease burden caused by Type 2 Diabetes in South Africa. *Global Health Action*. 2013; 6
13. France EF., Wyke S., Gunn JM., Mair FS., McLean G., Mercer S. Multimorbidity in primary care: a systematic review of prospective cohort studies. *Br J Gen Pract* 2012; 62:e297-e307.
14. Prados-Torres A, Calderón-Larrañaga A., Hanco-Saavedra J, Poblador-Plou B, van den Akker M. Multimorbidity patterns: a systematic review. *Journal of Clinical Epidemiology* 2014; 67:254-66.
15. Statistics South Africa. Mortality and causes of death in South Africa Findings from death notification Statistics South Africa, Pretoria, South Africa 2014.
16. UNAIDS. HIV and AIDS estimates 2015.
17. Oni T, Youngblood E, Boule A, McGrath N, Wilkinson RJ, Levitt NS. Patterns of HIV, TB, and non-communicable disease multi-morbidity in peri-urban South Africa-a cross sectional study. *BMC Infect Dis*. 2015; 15:s12879-015.

18. Department of Health Free State. The Free State Department of Health: Annual Performance Plan 2015/20162016.
19. Nuño R., Coleman K., Bengoa R., Sauto R. Integrated care for chronic conditions: the contribution of the ICCC Framework. *Health Policy* 2012; 105:55-64.
20. World Health Organization. Innovative care for chronic conditions: Building Blocks for Action2013: Available from: <http://www.who.int/chp/knowledge/publications/iccreport/en/>
21. National Department of Health of South Africa. Integrated Chronic Disease Management Manual, A step-by-step guide for implementation. South Africa2012.
22. Proctor EK, Powell BJ, McMillen JC. Implementation strategies: recommendations for specifying and reporting. *Implement Sci* 2013; 8:1748-5908.
23. Gray A, Vawda Y, Padarath A, King J, English R. Health Policy and Legislation. In: Padarath A, King J, R E, editors. *South African Health Review*. Durban, South Africa: Health Systems Trust; 2015.
24. Gabert R, Wollum A, Nyembezi A, Petersen Z, Phillips B, Reitsma M, et al. The need for integrated chronic care in South Africa: preliminary lessons from the HealthRise program. 21st International AIDS Conference; Durban, South Africa2016.
25. Aantjes C, Quinlan T, Bunders J. Integration of community home based care programmes within national primary health care revitalisation strategies in Ethiopia, Malawi, South-Africa and Zambia: a comparative assessment. *Globalization and health*. 2014; 10:85.
26. Maimela E, Geertruyden JP, Alberts M, Modjadji SE, Meulemans H, Fraeyman J, et al. The perceptions and perspectives of patients and health care providers on chronic diseases management in rural South Africa: a qualitative study. *BMC Health Serv Res*. 2015; 15
27. David H., Peters NT., Tran TA. Implementation research in health: a practical guide. Alliance for Health Policy and Systems, World Health Organization. 2013.
28. Mahomed OH, Asmall S, Freeman M, J. An integrated chronic disease management model: a diagonal approach to health system strengthening in South Africa. *J of Health Care Poor Underserved* 2014; 25:1723-9.
29. UNAIDS. HIV and AIDS estimates2017.
30. Statistics South Africa. Use of health facilities and levels of selected health conditions in South Africa: Findings from the General Household Survey, 20112011. Report No.: Report No. 03–00–05 (2011).
31. Keeton C. Bridging the gap in South Africa. *Bulletin of the World Health Organization*. 2010; 88:803-4.
32. Kauntzky K, Tollman SM. A Perspective on Primary Health Care in South Africa. In: Barron P, Roma-Reardon J, editors. *South African Health Review*. South Africa: Health Systems Trust; 2008. p. 1025-715.
33. Bateman C. How will NHI affect my practice? Workshop seeks answers. *South African Medical Journal* 2010; 100:350-2.
34. Massyn N, Peer N, Padarath A, Barron P, Day C. *District Health Barometer 2014/15*. Durban, South Africa: Health Systems Trust; 2015.
35. Day C, Gray A. Health and related indicators. South Africa: Health Systems Trust2016.
36. Shisana O, Rehle T, Simbayi LC, Zuma K, Jooste S, Zungu N, et al. *South African National HIV Prevalence, Incidence and Behaviour Survey, 2012*. South Africa2012.
37. I. D. F. International Diabetes Federation. Atlas sixth edition IDF Brussels. 2013.

- 1  
2  
3 38. Green H. Use of theoretical and conceptual frameworks in qualitative research.  
4 Nurse Res 2014; 21:34-8.  
5  
6 39. Moore G, Audrey S, Barker M, Bond L, et. al. Process Evaluation of Complex  
7 Interventions. United Kingdom Medical Research Council (MRC) Guidance: UK MRC2008.  
8 40. Craig P., Dieppe P., Macintyre S., Michie S., Nazareth I., Petticrew M. Medical  
9 Research Council Guidance:Developing and evaluating complex interventions the new  
10 Medical Research Council guidance BMJ 2008; 337  
11  
12 41. Moore GF, Audrey S, Barker M, Bond L, Bonell C, Hardeman W, et al. Process  
13 evaluation of complex interventions: Medical Research Council guidance. BMJ 2015;  
14 350:h1258.  
15  
16 42. Sanson-Fisher RW. Diffusion of innovation theory for clinical change. Medical Journal  
17 of Australia. 2014; 6.  
18 43. Taghreed A, Moses A, David E. CostIt software. World Health Organization [serial on  
19 the Internet]. 2007.  
20  
21 44. Mojtaba Vaismoradi, Hannele Turunen, Terese Bondas. Content analysis and  
22 thematic analysis: Implications for conducting a qualitative descriptive study. Nursing and  
23 Health Sciences. 2013; 15:398 - 405.  
24  
25 45. South African Revenue Service. Income Tax Act No. 58 of 1962. Binding General  
26 Ruling (Income Tax): No. 8, Wear-and-tear or depreciation allowance. South Africa, 2012.  
27  
28  
29  
30  
31  
32  
33  
34  
35  
36  
37  
38  
39  
40  
41  
42  
43  
44  
45  
46  
47  
48  
49  
50  
51  
52  
53  
54  
55  
56  
57  
58  
59  
60

1  
2  
3  
4 **Acknowledgements:** We would like to acknowledge the people that have reviewed  
5 this protocol and provided feedback: Leslie London, Edina Sinanovic, Maylene Shung  
6 King and South African MRC Self-Initiated Research Grant division.  
7

8  
9 **Funding Statement:** The proposed study outlined in this protocol will be supported  
10 by the South African Medical Research Council under a Self-Initiated Research Grant  
11 (ID:494184). The views and opinions expressed are those of the author(s) and do not  
12 necessarily represent the official views of the SA MRC. The sponsor appointed  
13 reviewers have critically assessed the protocol and requested some changes to be  
14 done prior to submission to ethics. The sponsor will have no role in data collection,  
15 analysis or reporting.  
16

17  
18 **Author Statement:** LL was involved in the conception, design literature review and  
19 writing. OA, MK and TO have contributed to the conception, design and critical review  
20 of the manuscript.  
21

22  
23 **Conflict of Interest:** The authors have no conflict of interest to declare.  
24

25 **Ethical Issues:** The protocol has been approved by the University of Cape Town and  
26 University of the Witwatersrand Human Research ethics committees. Any changes  
27 required, will have to be submitted to both ethics committees.  
28

29 **Word Count:** 3889  
30

## 31 32 33 **Figures**

34  
35 *Figure 1: Map of South Africa with the ICDM model pilot sites highlighted*  
36

37 *Figure 2: Integrated Chronic Disease Management Model<sup>21</sup>*  
38

39 *Figure 3: The Process Evaluation framework for complex interventions<sup>43</sup>*  
40

41  
42 *Figure 4: Modified Process Evaluation Framework for assessing the fidelity and cost*  
43 *of the ICDM model implementation*  
44  
45  
46  
47  
48  
49  
50  
51  
52  
53  
54  
55  
56  
57  
58  
59  
60

1  
2  
3  
4  
5  
6  
7  
8  
9  
10  
11  
12  
13  
14  
15  
16  
17  
18  
19  
20  
21  
22  
23  
24  
25  
26  
27  
28  
29  
30  
31  
32  
33  
34  
35  
36  
37  
38  
39  
40  
41  
42  
43  
44  
45  
46  
47  
48  
49  
50  
51  
52  
53  
54  
55  
56  
57  
58  
59  
60

**Figures**

Figure 1: Map of South Africa with the ICDM model pilot sites highlighted

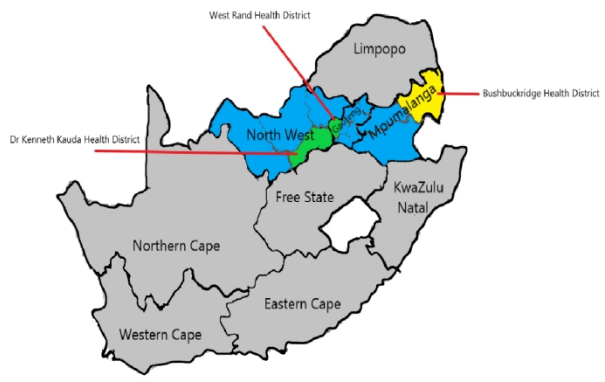

Figure 1: Map of South Africa with the ICDM model pilot sites highlighted  
209x297mm (200 x 200 DPI)

Figure 2: Integrated Chronic Disease Management Model<sup>21</sup>

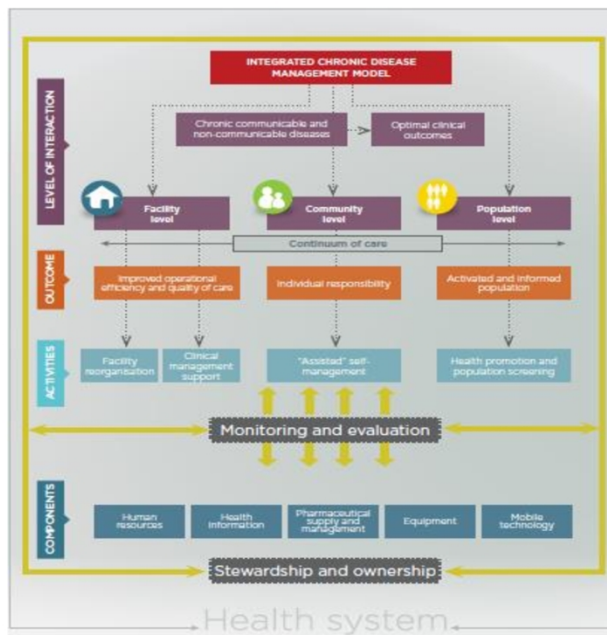

Figure 2: Integrated Chronic Disease Management Model

209x297mm (200 x 200 DPI)

1  
2  
3  
4  
5  
6  
7  
8  
9  
10  
11  
12  
13  
14  
15  
16  
17  
18  
19  
20  
21  
22  
23  
24  
25  
26  
27  
28  
29  
30  
31  
32  
33  
34  
35  
36  
37  
38  
39  
40  
41  
42  
43  
44  
45  
46  
47  
48  
49  
50  
51  
52  
53  
54  
55  
56  
57  
58  
59  
60

Figure 3: The Process Evaluation framework for complex interventions<sup>43</sup>

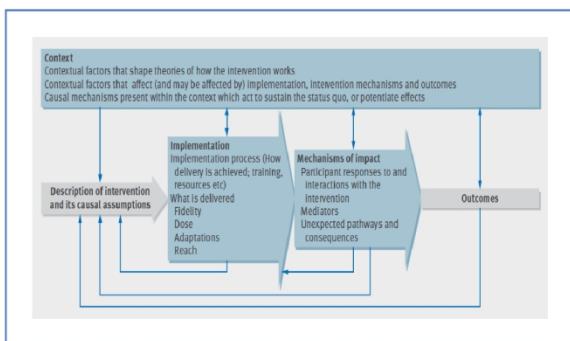

Figure 3: The Process Evaluation framework for complex interventions<sup>43</sup>

209x297mm (200 x 200 DPI)

Figure 4: Modified Process Evaluation Framework for assessing the fidelity and cost of the ICDM model implementation

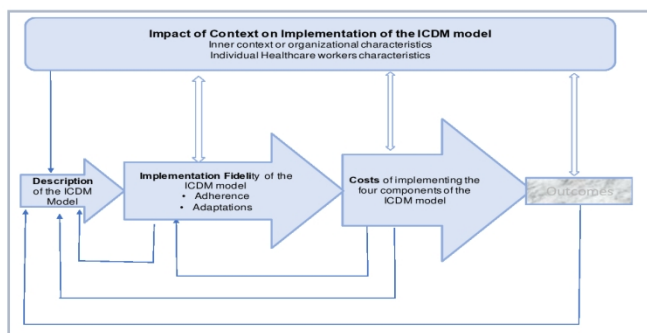

Figure 4: Modified Process Evaluation Framework for assessing the fidelity and cost of the ICDM model implementation

209x297mm (200 x 200 DPI)



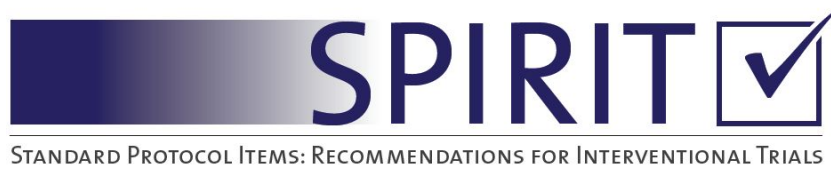

SPIRIT 2013 Checklist: Recommended items to address in a clinical trial protocol and related documents\*

| Section/item                      | Item No | Description                                                                                                                                                                                                                                                                                        |
|-----------------------------------|---------|----------------------------------------------------------------------------------------------------------------------------------------------------------------------------------------------------------------------------------------------------------------------------------------------------|
| <b>Administrative information</b> |         |                                                                                                                                                                                                                                                                                                    |
| Title                             | 1       | Descriptive title identifying the study design, population, interventions, and, if applicable, trial acronym ✓ - pg. 1                                                                                                                                                                             |
| Trial registration                | 2a      | Trial identifier and registry name. If not yet registered, name of intended registry – <b>N/A</b>                                                                                                                                                                                                  |
|                                   | 2b      | All items from the World Health Organization Trial Registration Data Set. – <b>N/A</b>                                                                                                                                                                                                             |
| Protocol version                  | 3       | Date and version identifier - ✓ - pg.1                                                                                                                                                                                                                                                             |
| Funding                           | 4       | Sources and types of financial, material, and other support ✓ - pg.18                                                                                                                                                                                                                              |
| Roles and responsibilities        | 5a      | Names, affiliations, and roles of protocol contributors - ✓ - pg.18                                                                                                                                                                                                                                |
|                                   | 5b      | Name and contact information for the trial sponsor <b>N/A</b>                                                                                                                                                                                                                                      |
|                                   | 5c      | Role of study sponsor and funders, if any, in study design; collection, management, analysis, and interpretation of data; writing of the report; and the decision to submit the report for publication, including whether they will have ultimate authority over any of these activities ✓ - pg.18 |
|                                   | 5d      | Composition, roles, and responsibilities of the coordinating centre, steering committee, endpoint adjudication committee, data management team, and other individuals or groups overseeing the trial, if applicable (see Item 21a for data monitoring committee) <b>N/A</b>                        |
| <b>Introduction</b>               |         |                                                                                                                                                                                                                                                                                                    |
| Background and rationale          | 6a      | Description of research question and justification for undertaking the trial, including summary of relevant studies (published and unpublished) examining benefits and harms for each intervention ✓ - pg. 2-4                                                                                     |
|                                   | 6b      | Explanation for choice of comparators – <b>N/A</b>                                                                                                                                                                                                                                                 |
| Objectives                        | 7       | Specific objectives or hypotheses ✓ - pg. 7                                                                                                                                                                                                                                                        |

1  
2  
3  
4  
5  
6  
7  
8  
9  
10  
11  
12  
13  
14  
15  
16  
17  
18  
19  
20  
21  
22  
23  
24  
25  
26  
27  
28  
29  
30  
31  
32  
33  
34  
35  
36  
37  
38  
39  
40  
41  
42  
43  
44  
45  
46  
47  
48  
49  
50  
51  
52  
53  
54  
55  
56  
57  
58  
59  
60

|              |   |                                                                                                                                                                                                                        |
|--------------|---|------------------------------------------------------------------------------------------------------------------------------------------------------------------------------------------------------------------------|
| Trial design | 8 | Description of trial design including type of trial (eg, parallel group, crossover, factorial, single group), allocation ratio, and framework (eg, superiority, equivalence, noninferiority, exploratory) – <b>N/A</b> |
|--------------|---|------------------------------------------------------------------------------------------------------------------------------------------------------------------------------------------------------------------------|

### **Methods: Participants, interventions, and outcomes**

|                      |     |                                                                                                                                                                                                                                                                                                                                                                                                 |
|----------------------|-----|-------------------------------------------------------------------------------------------------------------------------------------------------------------------------------------------------------------------------------------------------------------------------------------------------------------------------------------------------------------------------------------------------|
| Study setting        | 9   | Description of study settings (eg, community clinic, academic hospital) and list of countries where data will be collected. Reference to where list of study sites can be obtained ✓ - pg. 7-8                                                                                                                                                                                                  |
| Eligibility criteria | 10  | Inclusion and exclusion criteria for participants. If applicable, eligibility criteria for study centres and individuals who will perform the interventions (eg, surgeons, psychotherapists) ✓ - pg. 9-10                                                                                                                                                                                       |
| Interventions        | 11a | Interventions for each group with sufficient detail to allow replication, including how and when they will be administered – N/A                                                                                                                                                                                                                                                                |
|                      | 11b | Criteria for discontinuing or modifying allocated interventions for a given trial participant (eg, drug dose change in response to harms, participant request, or improving/worsening disease) - N/A                                                                                                                                                                                            |
|                      | 11c | Strategies to improve adherence to intervention protocols, and any procedures for monitoring adherence (eg, drug tablet return, laboratory tests) - N/A                                                                                                                                                                                                                                         |
|                      | 11d | Relevant concomitant care and interventions that are permitted or prohibited during the trial – N/A                                                                                                                                                                                                                                                                                             |
| Outcomes             | 12  | Primary, secondary, and other outcomes, including the specific measurement variable (eg, systolic blood pressure), analysis metric (eg, change from baseline, final value, time to event), method of aggregation (eg, median, proportion), and time point for each outcome. Explanation of the clinical relevance of chosen efficacy and harm outcomes is strongly recommended ✓ - pg. 11 – 12. |
| Participant timeline | 13  | Time schedule of enrolment, interventions (including any run-ins and washouts), assessments, and visits for participants. A schematic diagram is highly recommended (see Figure) N/A                                                                                                                                                                                                            |
| Sample size          | 14  | Estimated number of participants needed to achieve study objectives and how it was determined, including clinical and statistical assumptions supporting any sample size calculations – N/A                                                                                                                                                                                                     |
| Recruitment          | 15  | Strategies for achieving adequate participant enrolment to reach target sample size                                                                                                                                                                                                                                                                                                             |

### **Methods: Assignment of interventions (for controlled trials) N/A**

Allocation:

|    |                |     |                                                                         |
|----|----------------|-----|-------------------------------------------------------------------------|
| 1  |                |     |                                                                         |
| 2  | Sequence       | 16a | Method of generating the allocation sequence (eg, computer-             |
| 3  | generation     |     | generated random numbers), and list of any factors for stratification.  |
| 4  |                |     | To reduce predictability of a random sequence, details of any planned   |
| 5  |                |     | restriction (eg, blocking) should be provided in a separate document    |
| 6  |                |     | that is unavailable to those who enrol participants or assign           |
| 7  |                |     | interventions                                                           |
| 8  |                |     |                                                                         |
| 9  |                |     |                                                                         |
| 10 | Allocation     | 16b | Mechanism of implementing the allocation sequence (eg, central          |
| 11 | concealment    |     | telephone; sequentially numbered, opaque, sealed envelopes),            |
| 12 | mechanism      |     | describing any steps to conceal the sequence until interventions are    |
| 13 |                |     | assigned                                                                |
| 14 |                |     |                                                                         |
| 15 | Implementation | 16c | Who will generate the allocation sequence, who will enrol participants, |
| 16 |                |     | and who will assign participants to interventions                       |
| 17 |                |     |                                                                         |
| 18 | Blinding       | 17a | Who will be blinded after assignment to interventions (eg, trial        |
| 19 | (masking)      |     | participants, care providers, outcome assessors, data analysts), and    |
| 20 |                |     | how                                                                     |
| 21 |                |     |                                                                         |
| 22 |                |     |                                                                         |
| 23 |                | 17b | If blinded, circumstances under which unblinding is permissible, and    |
| 24 |                |     | procedure for revealing a participant's allocated intervention during   |
| 25 |                |     | the trial                                                               |
| 26 |                |     |                                                                         |
| 27 |                |     |                                                                         |

### Methods: Data collection, management, and analysis

|    |                 |     |                                                                          |
|----|-----------------|-----|--------------------------------------------------------------------------|
| 28 |                 |     |                                                                          |
| 29 |                 |     |                                                                          |
| 30 | Data collection | 18a | Plans for assessment and collection of outcome, baseline, and other      |
| 31 | methods         |     | trial data, including any related processes to promote data quality (eg, |
| 32 |                 |     | duplicate measurements, training of assessors) and a description of      |
| 33 |                 |     | study instruments (eg, questionnaires, laboratory tests) along with      |
| 34 |                 |     | their reliability and validity, if known. Reference to where data        |
| 35 |                 |     | collection forms can be found, if not in the protocol ✓ - pg. 11-12      |
| 36 |                 |     |                                                                          |
| 37 |                 |     |                                                                          |
| 38 |                 | 18b | Plans to promote participant retention and complete follow-up,           |
| 39 |                 |     | including list of any outcome data to be collected for participants who  |
| 40 |                 |     | discontinue or deviate from intervention protocols – N/A                 |
| 41 |                 |     |                                                                          |
| 42 | Data            | 19  | Plans for data entry, coding, security, and storage, including any       |
| 43 | management      |     | related processes to promote data quality (eg, double data entry;        |
| 44 |                 |     | range checks for data values). Reference to where details of data        |
| 45 |                 |     | management procedures can be found, if not in the protocol ✓ - pg.       |
| 46 |                 |     | 11-12                                                                    |
| 47 |                 |     |                                                                          |
| 48 |                 |     |                                                                          |
| 49 | Statistical     | 20a | Statistical methods for analysing primary and secondary outcomes.        |
| 50 | methods         |     | Reference to where other details of the statistical analysis plan can be |
| 51 |                 |     | found, if not in the protocol - ✓ - pg. 11-12                            |
| 52 |                 |     |                                                                          |
| 53 |                 |     |                                                                          |
| 54 |                 | 20b | Methods for any additional analyses (eg, subgroup and adjusted           |
| 55 |                 |     | analyses) ✓ - pg. 11 -12                                                 |
| 56 |                 |     |                                                                          |
| 57 |                 | 20c | Definition of analysis population relating to protocol non-adherence     |
| 58 |                 |     | (eg, as randomised analysis), and any statistical methods to handle      |
| 59 |                 |     | missing data (eg, multiple imputation) N/A                               |
| 60 |                 |     |                                                                          |

## Methods: Monitoring

|                 |     |                                                                                                                                                                                                                                                                                                                                             |
|-----------------|-----|---------------------------------------------------------------------------------------------------------------------------------------------------------------------------------------------------------------------------------------------------------------------------------------------------------------------------------------------|
| Data monitoring | 21a | Composition of data monitoring committee (DMC); summary of its role and reporting structure; statement of whether it is independent from the sponsor and competing interests; and reference to where further details about its charter can be found, if not in the protocol. Alternatively, an explanation of why a DMC is not needed - N/A |
|                 | 21b | Description of any interim analyses and stopping guidelines, including who will have access to these interim results and make the final decision to terminate the trial – N/A                                                                                                                                                               |
| Harms           | 22  | Plans for collecting, assessing, reporting, and managing solicited and spontaneously reported adverse events and other unintended effects of trial interventions or trial conduct                                                                                                                                                           |
| Auditing        | 23  | Frequency and procedures for auditing trial conduct, if any, and whether the process will be independent from investigators and the sponsor                                                                                                                                                                                                 |

## Ethics and dissemination

|                               |     |                                                                                                                                                                                                                                            |
|-------------------------------|-----|--------------------------------------------------------------------------------------------------------------------------------------------------------------------------------------------------------------------------------------------|
| Research ethics approval      | 24  | Plans for seeking research ethics committee/institutional review board (REC/IRB) approval ✓ - pg. 1                                                                                                                                        |
| Protocol amendments           | 25  | Plans for communicating important protocol modifications (eg, changes to eligibility criteria, outcomes, analyses) to relevant parties (eg, investigators, REC/IRBs, trial participants, trial registries, journals, regulators) ✓ - pg. 1 |
| Consent or assent             | 26a | Who will obtain informed consent or assent from potential trial participants or authorised surrogates, and how (see Item 32) N/A                                                                                                           |
|                               | 26b | Additional consent provisions for collection and use of participant data and biological specimens in ancillary studies, if applicable N/A                                                                                                  |
| Confidentiality               | 27  | How personal information about potential and enrolled participants will be collected, shared, and maintained in order to protect confidentiality before, during, and after the trial ✓ - pg. 11                                            |
| Declaration of interests      | 28  | Financial and other competing interests for principal investigators for the overall trial and each study site ✓ - pg. 1                                                                                                                    |
| Access to data                | 29  | Statement of who will have access to the final trial dataset, and disclosure of contractual agreements that limit such access for investigators ✓ - pg. 1                                                                                  |
| Ancillary and post-trial care | 30  | Provisions, if any, for ancillary and post-trial care, and for compensation to those who suffer harm from trial participation -N/A                                                                                                         |

- 1  
2  
3  
4  
5  
6  
7  
8  
9  
10  
11  
12  
13  
14  
15
- |                         |     |                                                                                                                                                                                                                                                                                                   |
|-------------------------|-----|---------------------------------------------------------------------------------------------------------------------------------------------------------------------------------------------------------------------------------------------------------------------------------------------------|
| Dissemination<br>policy | 31a | Plans for investigators and sponsor to communicate trial results to participants, healthcare professionals, the public, and other relevant groups (eg, via publication, reporting in results databases, or other data sharing arrangements), including any publication restrictions<br>✓ - pg. 12 |
|                         | 31b | Authorship eligibility guidelines and any intended use of professional writers - ✓ - pg. 13                                                                                                                                                                                                       |
|                         | 31c | Plans, if any, for granting public access to the full protocol, participant-level dataset, and statistical code ✓ - pg. 13                                                                                                                                                                        |

## 16 Appendices

- 17  
18  
19  
20  
21  
22  
23  
24
- |                               |    |                                                                                                                                                                                                      |
|-------------------------------|----|------------------------------------------------------------------------------------------------------------------------------------------------------------------------------------------------------|
| Informed consent<br>materials | 32 | Model consent form and other related documentation given to participants and authorised surrogates – Appendix 1                                                                                      |
| Biological<br>specimens       | 33 | Plans for collection, laboratory evaluation, and storage of biological specimens for genetic or molecular analysis in the current trial and for future use in ancillary studies, if applicable – N/A |

---

25 \*It is strongly recommended that this checklist be read in conjunction with the SPIRIT 2013  
26 Explanation & Elaboration for important clarification on the items. Amendments to the  
27 protocol should be tracked and dated. The SPIRIT checklist is copyrighted by the SPIRIT  
28 Group under the Creative Commons "[Attribution-NonCommercial-NoDerivs 3.0 Unported](https://creativecommons.org/licenses/by-nc-nd/3.0/)"  
29 license.  
30  
31  
32  
33  
34  
35  
36  
37  
38  
39  
40  
41  
42  
43  
44  
45  
46  
47  
48  
49  
50  
51  
52  
53  
54  
55  
56  
57  
58  
59  
60

# BMJ Open

## Process evaluation of Fidelity and Costs of implementing the Integrated Chronic Disease Management Model in South Africa: Mixed Methods Study Protocol

|                                 |                                                                                                                                                                                                                                                                                                                                                                                                                                                                                         |
|---------------------------------|-----------------------------------------------------------------------------------------------------------------------------------------------------------------------------------------------------------------------------------------------------------------------------------------------------------------------------------------------------------------------------------------------------------------------------------------------------------------------------------------|
| Journal:                        | <i>BMJ Open</i>                                                                                                                                                                                                                                                                                                                                                                                                                                                                         |
| Manuscript ID                   | bmjopen-2019-029277.R1                                                                                                                                                                                                                                                                                                                                                                                                                                                                  |
| Article Type:                   | Protocol                                                                                                                                                                                                                                                                                                                                                                                                                                                                                |
| Date Submitted by the Author:   | 09-Apr-2019                                                                                                                                                                                                                                                                                                                                                                                                                                                                             |
| Complete List of Authors:       | Lebina, Limakatso; University of the Witwatersrand, Perinatal HIV Research Unit; University of Cape Town Faculty of Health Sciences, School of Public Health and Family Medicine<br>Alaba, Olufunke; University of Cape Town, School of Public Health and Family Medicine<br>Kawonga, Mary; University of the Witwatersrand, School of Public Health<br>Oni, Tolu; University of Cape Town, School of Public Health and Family Medicine; University of Cambridge, MRC Epidemiology Unit |
| <b>Primary Subject Heading</b>: | Health services research                                                                                                                                                                                                                                                                                                                                                                                                                                                                |
| Secondary Subject Heading:      | Patient-centred medicine, Public health, Evidence based practice                                                                                                                                                                                                                                                                                                                                                                                                                        |
| Keywords:                       | implement, ICDM, intervention evaluation                                                                                                                                                                                                                                                                                                                                                                                                                                                |
|                                 |                                                                                                                                                                                                                                                                                                                                                                                                                                                                                         |

SCHOLARONE™  
Manuscripts

1  
2  
3 1 **Process evaluation of Fidelity and Costs of implementing the Integrated**  
4 2 **Chronic Disease Management Model in South Africa: Mixed Methods Study**  
5 3 **Protocol**  
6 4  
7 5  
8 6

9 6 Version 2.0, Dated 06 April 2019  
10 7

11 8 1. Limakatso Lebina (MBChB, MPH)\* (Corresponding author)

12 9 Affiliations:

13 10 Perinatal HIV Research Unit (PHRU), SA MRC Soweto Matlosana Collaborating  
14 11 Centre for HIV/AIDS and TB, Faculty of Health Sciences, University of the  
15 12 Witwatersrand, Johannesburg, South Africa;

16 13 School of Public Health and Family Medicine, University of Cape Town

17 14 Email: lebinal@phru.co.za

18 15 2. Olufunke A. Alaba (BSc, MSc, PhD)

19 16 Affiliation: School of Public Health and Family Medicine, University of Cape Town

20 17 Email: olufunke.alaba@uct.ac.za

21 18 3. Mary Kawonga (BSc, MBChB, DipHSM, PhD)

22 19 Affiliation: School of Public Health, University of the Witwatersrand

23 20 Email: Mary.Kawonga@wits.ac.za

24 21 4. Tolu Oni (MBBS, MRCP, MPH, FCPHM, MD(Res))

25 22 Affiliation: School of Public Health and Family Medicine, University of Cape Town;

26 23 MRC Epidemiology Unit, University of Cambridge

27 24 Email: Tolu.Oni@mrc-epid.cam.ac.uk  
28 25  
29 26  
30 27  
31 28  
32 29

33 30  
34 31  
35 32  
36 33  
37 34  
38 35  
39 36  
40 37  
41 38  
42 39  
43 40  
44 41  
45 42  
46 43  
47 44  
48 45  
49 46  
50 47  
51 48  
52 49  
53 50  
54 51  
55 52  
56 53  
57 54  
58 55  
59 56  
60 57

Keywords: implementation, ICDM model, intervention evaluation

## 33 **Abstract**

34 **Introduction:** The South African Department of health has developed and  
35 implemented the Integrated Chronic Disease Management (ICDM) model to respond  
36 to the increased utilization of primary healthcare (PHC) services due to a surge of non-  
37 communicable diseases co-existing with a high prevalence of communicable  
38 diseases. However, some of the expected outcomes on implementing the ICDM model  
39 have not been achieved. The aims of this study are to assess if the observed sub-  
40 optimal outcomes of the ICDM model implementation are due to lack of fidelity to the  
41 ICDM model; to examine the contextual factors associated with the implementation  
42 fidelity, and to calculate implementation costs.

43  
44 **Methods and Analysis:** A process evaluation, mixed methods study in sixteen pilot  
45 clinics from two health districts to assess the degree of fidelity to four major  
46 components of the ICDM model. Activity scores will be summed per component and  
47 overall fidelity score will be calculated by summing the various component scores, and  
48 compared between components, facilities and districts. Multivariate analysis will be  
49 used to examine the association between contextual factors and the degree of fidelity,  
50 individual and team characteristics, facility features, and organizational culture  
51 indicators will be included in the regression. Health system financial and economic  
52 costs of implementing the four components of the ICDM model will be calculated using  
53 an ingredient approach. The unit of implementation costs will be by activity of each of  
54 the major components of the ICDM model. Sensitivity analysis will be carried out using  
55 clinic size, degree of fidelity, and different inflation situations.

56  
57 **Ethics and Dissemination:** The protocol has been approved by the University of  
58 Cape Town and University of the Witwatersrand Human Research ethics committees.  
59 The results of the study will be shared with the department of health, participating  
60 health facilities and the through scientific publications and conference presentations.

61



## 62 **Strengths and Limitations of this study**

- 63 • This study uses implementation research principles to provide data on the  
64 degree of fidelity to the ICDM model for optimizing the model
- 65 • Process evaluation will provide an indication of how the ICDM model has been  
66 modified in different contexts can explain variability in the implementation  
67 outcomes.
- 68 • Implementation costs assessments are essential in public health programs to  
69 inform resource allocation during planning and budgeting and to inform  
70 economic evaluations
- 71 • The reliance on the service provider to accurately provide information on the  
72 implementation activities or insufficiencies of those activities is a limitation of  
73 this study.
- 74 • Although the clinics may not be representative of all districts and clinics in the  
75 country, the results of this study could be applied to clinics similar in size or  
76 patient load and other integrated disease management models.  
77

78  
79  
80

## 82 Background

83  
84 Chronic diseases and multi-morbidity is increasing in developing countries due to  
85 epidemiological transition of increasing prevalence of non-communicable diseases  
86 (NCDs) in the presence of rampant infectious diseases<sup>1,2</sup>. By 2025, it is estimated  
87 that the burden of NCDs in sub-Saharan Africa will be higher than that of  
88 communicable diseases (CD)<sup>3</sup>. The increase in urbanization, economic development,  
89 aging, decrease of physical activity and poor dietary options are some of the  
90 contributing factors to the increasing prevalence of NCDs in developing countries<sup>4, 5</sup>.  
91 There is also a complex interaction of risk factors, management and health outcomes  
92 between NCDs and CDs, resulting a rise in chronic disease mulitmorbidty<sup>6,7</sup>. Multi-  
93 morbidity often results in reduced levels of physical capability, high rates of health  
94 services utilization and attendant costs and higher mortality rates<sup>8,9</sup>. The double  
95 burden (NCDs and CDs) of diseases is costly to the health systems (increased  
96 utilization, medication), the economies, households and individuals<sup>2</sup>. Therefore,  
97 chronic disease management needs to be comprehensive and take into consideration  
98 these interactions in disease prevention, management and control.

99  
100 In South Africa, the current leading health problems are NCDs, accounting for 51.3%  
101 of all deaths, followed by CDs 38.4%, and injuries 10.3%<sup>10</sup>. South Africa like many  
102 Sub-Saharan African countries has been severely affected by the HIV/AIDS epidemic,  
103 with 7.1 million people living with HIV; and 18.9% of people between the ages of 15-  
104 49years being HIV infected<sup>11</sup>. As a result, there is an increase in the prevalence of  
105 multi-morbidity<sup>12</sup>. Tuberculosis (TB), Human Immune Deficiency Syndrome (HIV) and  
106 NCDs (mainly Hypertension (HPT) and Diabetes Mellitus (DM) ) account for 45% of  
107 all primary health care consultations, with a multi-morbidity prevalence of 22.6%<sup>9,13</sup>.

108  
109 Unresponsive health systems often provide services that are not aligned with the  
110 health requirements of the population being served<sup>14</sup>. A more comprehensive chronic  
111 disease management model, combining both CDs and NCDs that reduces health  
112 utilization and promotes self-management is one of the strategies that have been  
113 recommended to address the challenges associated with the management of  
114 multimorbid chronic diseases<sup>2, 14</sup>. The chronic care model (CCM) and Innovative Care  
115 for Chronic Conditions (ICCC) framework have been recommended as health system

1  
2  
3 116 approaches to deal with multi-morbidity<sup>15</sup>. However, there have been significant  
4  
5 117 resources and strategies allocated to the implementation of HIV programs and  
6  
7 118 consequently the non-communicable chronic diseases have been overlooked. To  
8  
9 119 rectify this imbalance, the South African National Department of Health developed and  
10  
11 120 has begun implementation of the Integrated Chronic Disease Management (ICDM)  
12  
121 model in order to improve efficiencies and quality of care in primary health care clinics  
13  
14 122 for patients with chronic diseases<sup>16</sup>.

15 123

### 17 124 **Integrated Chronic Disease Management Model**

18 125

20 126 The ICDM model was piloted from 2011 in 42 clinics from three health districts in three  
21  
22 127 different provinces (Figure 1) of South Africa as follows: West Rand in Gauteng  
23  
24 128 Province, Bushbuckridge in Mpumalanga and Dr. Kenneth Kaunda in North West  
25  
26 129 Province<sup>17,18</sup>. As part of a broader national approach to revitalize primary health care  
27  
28 130 (PHC) services, reduce fragmentation of services and ensure that each PHC facility  
29  
30 131 meets national minimum standards, the “ideal clinic” initiative was also started in  
31  
32 132 2013<sup>19</sup>. The principles of the “ideal clinic” incorporate the majority of the activities  
33  
34 133 required for ICDM implementation and provides standard operating procedures for the  
35  
36 134 Ideal Clinic Realisation and Maintenance (ICRM) programme<sup>20, 21</sup>. One of the  
37  
38 135 components of the ICRM programme is Integrated Clinical Services Management  
39  
40 136 (ICSM) which focuses on health services being structured in four (acute, chronic,  
41  
42 137 preventative and promotive and health support) streams.<sup>20, 21</sup> The principles of the  
43  
44 138 ICRM, ICSM and the ICDM model cover integration of services, good administrative  
45  
46 139 processes, functional infrastructure and equipment, adequate personnel, ensuring  
47  
48 140 adequate levels of medicines and supplies and the use of applicable protocols and  
49  
50 141 guidelines in diseases management<sup>19-21</sup>.

51 142

52 143 The four major components (action points) of the ICDM implementation are: facility re-  
53  
54 144 organization for efficiency, clinical supportive management, assisted self-support and  
55  
56 145 strengthening of support systems (Figure 2)<sup>16</sup>. The ICDM priority and core standards  
57  
58 146 are 1) improving the values and attitudes of staff, 2) patient safety and security and  
59  
60 147 infection prevention and control, and 3) availability of medicines and supplies<sup>16</sup>.  
148 Assuming full implementation of the ICDM as recommended, the expected outcomes  
149 include improved operational efficiency and quality of care, improved individual

1  
2  
3 150 responsibility towards their health and an activated and informed community<sup>16</sup>. The  
4  
5 151 ICDM model also provides guidelines on booking systems for patients with chronic  
6  
7 152 diseases, clinic flow, organization of waiting areas and consultation rooms and  
8  
9 153 dispensing medication practices that promote adherence and minimize medication  
10  
11 154 shortages. In order to avoid fragmentation of services, the ICDM recommends a multi-  
12  
13 155 disciplinary treating team to provide care to all patients with chronic illnesses and be  
14  
15 156 trained on how to assess and manage drug-drug interactions and disease interactions.  
16  
17 157 Mentoring, supervision and training of the PHC nurses to be provided the district  
18  
19 158 Clinical Specialist Team (DCST)<sup>16</sup>. The DCST other responsibilities include  
20  
21 159 monitoring of patient clinical outcomes through clinical audits and strengthening of  
22  
23 160 referral systems for complicated patients<sup>16</sup>. The components or building blocks for  
24  
25 161 ICDM model include human resources, health information, mobile technology,  
26  
27 162 equipment and pharmaceutical supply and management<sup>16</sup>.

28  
29 163  
30  
31 164 **The ICDM Model Pilot Phase Implementation:** The pilot phase was supported with  
32  
33 165 quality improvement reviews and consultation with all staff members at the facility-,  
34  
35 166 district- and province-levels to refine the model even further<sup>18</sup>. Some of the  
36  
37 167 implementation challenges identified in these consultations were lack of key  
38  
39 168 equipment, an emphasis on curative health services with minimal focus on prevention,  
40  
41 169 the ill-defined role of community health care workers and delayed formation of out of  
42  
43 170 facility chronic medication collection sites<sup>18</sup>. Lack for these necessary building blocks  
44  
45 171 for the ICDM model has resulted in the implementation of hybrids of the original  
46  
47 172 model<sup>18</sup>. The limitations of the ICDM model identified include its focus on secondary  
48  
49 173 and tertiary prevention of disease within the healthcare facilities, and the lack of  
50  
51 174 guidelines on social and environmental changes for the prevention of risk factors and  
52  
53 175 onset of chronic diseases<sup>16</sup>.

### 54 176 55 177 **Management of Chronic Conditions in PHC Facilities**

56  
57 178 An evaluation of PHC services in South Africa showed low rates of diagnosis for  
58  
59 179 chronic diseases, and the few that are diagnosed, are not managed appropriately and  
60  
180 do not achieve the treatment targets<sup>22,23</sup>. The lack of key equipment in PHC clinics to  
181  
182 diagnose and monitor total cholesterol, blood pressure and blood glucose contribute  
183  
184 these challenges, with patients reporting the need to travel to higher levels of care to  
185  
186 access certain medication and diagnostic tests<sup>22</sup>. Additional barriers included the

1  
2  
3 184 insufficient consultation time that patients report with their healthcare providers even  
4  
5 185 after long waiting periods at the facility due to high volumes of patients<sup>22</sup>; poor  
6  
7 186 knowledge on chronic disease, shortage of medication and shortage of healthcare  
8  
9 187 workers resulting in long waiting periods at PHC clinics<sup>24</sup>. The nurses knowledge of  
10  
11 188 chronic diseases was also found to be poor due to inadequate training, unavailability  
12  
13 189 of guidelines and lack of supervision<sup>24</sup>.

14 190

15 191 The implementation of an innovative intervention can be affected by the design of the  
16  
17 192 intervention, context and or implementation outcomes<sup>25</sup>. New innovative interventions  
18  
19 193 could fail to achieve intended objectives because of implementation barriers or failures  
20  
21 194 in the design<sup>25</sup>. The observed impact of the ICDM model in the management of chronic  
22  
23 195 diseases has been an improvement in the patients' records, compliance with clinical  
24  
25 196 guidelines and health outcomes for patients on antiretroviral medication but not those  
26  
27 197 on hypertension treatment<sup>26,27</sup>. Irregular supplies and stock-outs of hypertension  
28  
29 198 medication was also not improved after the implementation of the ICDM model<sup>28</sup>. The  
30  
31 199 patients' perspectives on the ICDM model inconveniences were a non-flexible  
32  
33 200 appointment system that affected access to services, long waiting times because of  
34  
35 201 personnel shortages and stigmatization of patients that are visited by community  
36  
37 202 healthcare workers<sup>28</sup>. However, it is not clear whether these observed and perceived  
38  
39 203 gains and shortcomings are as a result of the inherent faults in the design of the model  
40  
41 204 or failure to adhere to the prescribed activities and/or the impact of contextual factors.

42 205

43 206 The successful implementation of the ICDM model requires a high degree of fidelity to  
44  
45 207 the recommended processes of delivering health care services with clear intervention  
46  
47 208 priorities and expected outcomes<sup>29,30</sup>. Although monitoring and evaluation tools exist  
48  
49 209 for the ICDM model implementation, they do not provide data on implementation  
50  
51 210 outcomes such as adoption, fidelity, penetration, acceptability, sustainability and  
52  
53 211 costs. Process evaluation of the ICDM model implementation would optimize practice  
54  
55 212 of the four major components and scale-up of the model, and the quality of care for  
56  
57 213 individuals affected by chronic illness, especially those with multi-morbidity.

58 214

59 215 Implementation of any intervention within a large complex health system is generally  
60  
216 unpredictable. An assessment of fidelity on the implementation of the model will  
217  
additionally measure quality of practice for continuous improvement, identify any

1  
2  
3 218 innovations that can improve models' processes and support systematic  
4  
5 219 implementation of the model. Although the implementation of the ICDM model was  
6  
7 220 subsequently followed by the ICRM programme that consists of the ICSM which has  
8  
9 221 a broader focus beyond chronic diseases, both these interventions have similar  
10  
11 222 principles, standards and aims of ensuring that patients get quality patient-centric care  
12  
13 223 that achieves the desired health outcomes<sup>19-21</sup>. We envisage lessons learnt from an  
14  
15 224 evaluation of the ICDM model can be beneficial in the strengthening of implementation  
16  
17 225 of the ICRM programme.  
18

226

227

20 228 Interviews with the actors in the ICDM model implementation will provide information  
21  
22 229 on their perceptions and experiences with implementation and how contextual factors  
23  
24 230 have affected fidelity to the model's guidelines. This can improve comparability,  
25  
26 231 generalizability and replicability of the results of this study. Assessing the cost of  
27  
28 232 implementing the various activities of the ICDM model will then assist with planning  
29  
30 233 and budgeting, as well as inform scalability and sustainability of the model.  
31

234

32 235 Therefore, the **aim** of this study is to evaluate selected implementation outcomes of  
33  
34 236 the ICDM model: fidelity and implementation costs, and to assess the influence of  
35  
36 237 contextual factors on ICDM model implementation fidelity in two health districts where  
37  
38 238 the ICDM has been piloted, from two different provinces in order to better understand  
39  
40 239 the processes of successful implementation of the ICDM model and how the model  
41  
42 240 can be optimized. The **objectives** of the study are:

- 43 241 1. To assess the degree of fidelity in the implementation of the ICDM model  
44  
45 242 2. To evaluate the influence of contextual factors on the implementation fidelity of the  
46  
47 243 ICDM model  
48  
49 244 3. To estimate the implementation costs of the ICDM model  
50

245

246

## 52 247 **Methods and Analysis**

53 248

### 54 249 **Setting**

55 250

56 251 This study will be conducted from August 2018 to July 2019 in two health districts (Dr.  
57  
58 252 Kenneth Kaunda in North West Province and West Rand District in Gauteng) that were  
59  
60 253 the pilot sites for the ICDM model implementation. Both districts are within socio-

1  
2  
3 254 economic quantile four (1 is most deprived and 5 is least deprived), however  
4  
5 255 comparing the North West to Gauteng province, poverty prevalence (33% vs. 27%)  
6  
7 256 and informal housing ( 21% vs. 19%) are slightly higher in the North West Province<sup>31</sup>,  
8  
9 257 <sup>32</sup>. The provincial HIV prevalence is 13.3% in North West Province and 12.4% in  
10  
11 258 Gauteng<sup>33</sup>. The prevalence of hypertension is high (31%- 39.7%) in both districts, a  
12  
13 259 reflection of large number of people accessing health services for chronic NCD<sup>31</sup>. The  
14  
15 260 prevalence of diabetes in South Africa is 8.27% (2.6 million), and 31.9% among adults  
16  
17 261 (20-79 years) with 1.2 million people with diabetes estimated to be undiagnosed<sup>34</sup>.  
18  
19 262

## 263 **Theoretical Framework**

### 264 *Process Evaluation of Complex Interventions*

265 Process evaluation frameworks assist in understanding the functioning of a complex  
266  
267 intervention by reviewing implementation processes and the influence of contextual  
268  
269 factors<sup>35,36</sup>. A complex intervention implementation process has multiple components  
270  
271 which interact to produce change, and or are difficult to implement and or target a  
272  
273 number of organizational levels<sup>35,37</sup>. Process evaluation is therefore useful for  
274  
275 assessing (Figure 3) fidelity (dose, adaptations, frequency and reach), clarifying the  
276  
277 usual mechanisms and processes and identifying the impact of contextual factors on  
278  
279 the variations in processes and outcomes<sup>38</sup>. A process evaluation framework will be  
30  
31 applied in this study to evaluate whether the processes for implementing the  
32  
33 intervention (the ICDM model) is being applied as intended according to the design  
34  
35 (fidelity) of the intervention, and how contextual factors influence the implementation  
36  
37 fidelity (Figure 4). The costs, quantity and quality of program activities provided and  
38  
39 evaluating the generalizability of the results in other different contexts is important  
40  
41 especially for a program that is already established<sup>38</sup>.  
42  
43  
44  
45  
46  
47

## 48 **Study Design**

49  
50 281 This is a process evaluation study using mixed methods to assess the degree of  
51  
52 282 fidelity, costs and impact of context on the implementation fidelity of the ICDM model.  
53  
54 283

## 55 **Objective-specific methodology**

56  
57 285 **Fidelity assessment** will be carried out to review if implementation of the ICDM model  
58  
59 286 adheres to content, coverage, frequency and duration as prescribed in the ICDM  
60

1  
2  
3 287 model manual in sixteen (8 in North West and 8 in Gauteng) clinics. As there are no  
4  
5 288 fidelity criteria in the literature that are suitable to adapt for assessing the ICDM model  
6  
7 289 implementation, we developed fidelity criteria based on the ICDM model guidelines<sup>16</sup>,  
8  
9 290 the ICRM programme monitoring tools<sup>21</sup> and published literature on the ICDM model<sup>18</sup>,  
10  
11 291 <sup>26, 28, 30</sup>. The basis of the criteria are the four (facility re-organization, clinical supportive  
12  
13 292 management, assisted self-management and strengthening of the support systems)  
14  
15 293 major components of the ICDM model<sup>16</sup>. The outlined prescribed activities are the  
16  
17 294 variables to be assessed on the implementation fidelity criteria. The expected outcome  
18  
19 295 of the fidelity criteria is to warrant that all the essential activities required for successful  
20  
21 296 implementation of the ICDM model have been captured. Each criterion under the four  
22  
23 297 major components will be listed as an item to be scored on the fidelity criteria. We will  
24  
25 298 assess the fidelity criteria in a pilot study, and finalize it on the basis of the results of  
26  
27 299 the pilot study. Sixteen clinics, from the twenty ICDM pilot clinics located in those  
28  
29 300 districts will be considered for inclusion if the clinic has been open and running without  
30  
31 301 any major interruptions (renovations, closures) in the last two years. At each clinic,  
32  
33 302 we will collect data using structured observations, review of facility records and  
34  
35 303 interviews with the healthcare workers (Table 1).

34  
35 304  
36  
37 305 **Contextual factors** (facility characteristics and characteristics of individuals and  
38  
39 306 teams) on fidelity will be examined in four clinics. Based on the degree of fidelity, **two**  
40  
41 307 **clinics**, one with a high, one with a low degree of fidelity will be selected each of the  
42  
43 308 two districts. The organizational contextual factors to be considered include  
44  
45 309 communication style, decision process and culture<sup>39</sup>. Individual level data for the  
46  
47 310 implementing teams will include demographics (age, gender, race, education level),  
48  
49 311 position role within the clinic, years in that role, their participation in the delivery of the  
50  
51 312 ICDM model. External (to the facility) context factors (socio-economic level, policies  
52  
53 313 and legislation) will not be evaluated in order to keep the study scope manageable.  
54  
55 314 We will use mixed-methods (interviews, facility assessments and culture surveys)  
56  
57 315 approach to assess the influence of context on implementation fidelity. We will conduct  
58  
59 316 qualitative interviews with thirty healthcare workers, purposively selected to represent  
60  
317 different cadres of staff members that implement and manage the ICDM model  
318 intervention for more than six months (Table 1). The interviews will be done on a one-  
319 to-one basis to minimize having group dynamics.



320

321 Participants' confidentiality will be protected at all times during the study and no  
322 electronic record will contain individual identifiers. A master list that contains the  
323 participants' identifiers will be kept in a separate lockable area. The results will also  
324 be presented in such a way that respondents cannot be identified.

325

326 **Costs:** The financial and economic costs of implementing the ICDM model from the  
327 health system perspective will be evaluated in the same four clinics. The health system  
328 implementation costs are an all-inclusive costing valuation that considers costs  
329 incurred by the providers of the service<sup>40</sup>. Assessing the implementation costs will be  
330 a partial economic evaluation as it will only focus on the costs of implementation and  
331 not the outcomes. The unit of implementation costs will be by activity of each of the  
332 major components of the ICDM model. Service level costs such as those pertaining to  
333 the development of the ICDM model will not be included as these costs were incurred  
334 in 2010/11 . The focus will be on post start-up annual costs required for the full  
335 implementation of the ICDM model in a typical year (Table 1). Both direct and indirect,  
336 and fixed and recurrent costs will be calculated.

337

338 Capital costs: Annualized equipment and capital costs will be calculated according to  
339 the volume being used for the ICDM model. Estimating annual costs will include  
340 adding up the acquisition, operation, maintenance and disposal costs.

341 Operational costs: In the financial documents review, key operational costs that we  
342 will check and categorize include human resources, office supplies and travel. Based  
343 on the useful life and the discount rate, an appropriate annualization factor will be  
344 determined. If there are any donations for program implementation (volunteers,  
345 healthcare workers not allocated to ICDM but assisting in service delivery, donated  
346 equipment or office supplies) they will be included. Medical and support staff labour  
347 costs will be calculated based on the full time equivalent, duration of involvement in  
348 the ICDM model implementation and the gross salary of the personnel.

349 A proportion of overhead costs of running the health facility like electricity, rent, water  
350 will be included in the implementation costs. Administrative costs at district and  
351 provincial level (which are beyond the facility) will not be included in the analysis.

352

1  
2  
3 353 *Patient and Public Involvement:* Previous research has shown that patients do not like  
4 354 some of the components of the ICDM model and that was the basis of the research  
5 355 question. Patients will not be enrolled in the study; however results will be shared with  
6 356 them through community and health facilities leadership.  
7  
8  
9

10 357

## 11 358 **Data Management and Analysis Plan**

12 359 The data will be collected using paper based questionnaires and later captured into  
13 360 an electronic database. There will be no identifying features (e.g. date of birth,  
14 361 addresses) in the database. The health facilities and healthcare workers that  
15 362 participated will be allocated a study number. Source documents will be safely kept  
16 363 and only accessible to study personnel. The data on costs will be manually entered  
17 364 into the CostIt software 2007<sup>41</sup> according to the provided major categories. CostIt  
18 365 software is a template designed to capture and automatically analyse cost data for  
19 366 different (hospital, PHC and programme) levels of the healthcare system<sup>41</sup>  
20  
21  
22  
23  
24  
25  
26  
27

28 367

29 368 Descriptive statistics (frequency, median, interquartile ranges, percentages) will be  
30 369 used to examine the general quantitative variables of the clinics, such as size, number  
31 370 of chronic patients, services offered, clinic team characteristics and overall functioning  
32 371 status. Following the evaluation, each clinic will receive a score for each of the fidelity  
33 372 criteria items. Item scores will be summed per component to give four overall ICDM  
34 373 component fidelity scores per facility. An overall ICDM model implementation fidelity  
35 374 score will be calculated per facility by summing the four component scores. The  
36 375 implementation fidelity scores will be summarized using descriptive statistics and  
37 376 compared between components, facilities and districts. The outcome of interest will be  
38 377 the degree of implementation fidelity.  
39  
40  
41  
42  
43  
44  
45

46 378

47  
48 379 The experiences and perceptions of the healthcare workers from the interviews will be  
49 380 analysed with REDCap software for Likert scaled questions and using thematic  
50 381 content analysis for barriers and facilitators of implementation fidelity for qualitative  
51 382 data. The six steps recommended by Braun and Clarke<sup>42</sup> for thematic content analysis  
52 383 that will be followed: Familiarization, generating initial codes, searching for themes  
53 384 throughout the database, reviewing and naming themes and summarizing the  
54 385 findings<sup>42</sup>. Multi-variate analysis using STATA 14 econometric software will be used  
55 386 to assess the effect of various contextual factors on the implementation fidelity of the  
56  
57  
58  
59  
60

387 ICDM model. The impact of both the organizational (case mix, financial flexibility and  
 388 culture) and implementing teams (work experience, cadre of HCW, training and  
 389 perceptions of ICDM) level factors on the degree of the ICDM model implementation  
 390 fidelity will be assessed. The initial analysis will include description of the sample,  
 391 followed by a bivariate analysis that includes t-tests and ANOVA to examine the  
 392 influence of contextual factors on implementation fidelity of the ICDM model.

393

394 Costs: Capital costs and other costs that have a life span of several years will be  
 395 annualized over the useful lifespan to get the equivalent annual costs. All costs will be  
 396 adjusted for inflation and discount. Equipment will be depreciated according to the  
 397 South African Accounting principles<sup>43</sup>. Sensitivity analyses will be conducted for other  
 398 possible variations in estimated costs. Sensitivity analyses will also be carried out to  
 399 explore different scenarios including size of clinic, degree of implementation fidelity  
 400 and other factors that could possibly affect costs based on literature.

401

402 *Table 1: Summary of study objectives, methods and expected outcomes for assessing the*  
 403 *fidelity, impact of contextual factors and costs of the ICDM model implementation*

404

|                                               | Objective                                                                                        | Methods                                                                                                                                                                                                                                                                                                                                                                                                   | Outcomes                                                                                                                                                                                                 |
|-----------------------------------------------|--------------------------------------------------------------------------------------------------|-----------------------------------------------------------------------------------------------------------------------------------------------------------------------------------------------------------------------------------------------------------------------------------------------------------------------------------------------------------------------------------------------------------|----------------------------------------------------------------------------------------------------------------------------------------------------------------------------------------------------------|
| Degree of Fidelity Assessment                 | To assess the degree of fidelity in the implementation of the ICDM model                         | Quantitative: Fidelity Evaluation in 16 ICDM model pilot PHC clinics using the Fidelity criteria scoring checklist template.<br>Data Sources: Key informants interviews, structured observations and review of facility records                                                                                                                                                                           | Degree of the ICDM model implementation fidelity for each activity and component of the ICDM model and overall scores by clinic and district.                                                            |
| Impact of contextual factors on ICDM fidelity | To evaluate the influence of contextual factors on the implementation fidelity of the ICDM model | Qualitative interviews with 30 HCW in four facilities, two per district using structured interview guides and organizational culture survey.<br>Quantitative data to assess association between contextual factors and degree of ICDM model fidelity                                                                                                                                                      | Health workers' perceptions of contextual factors that influence implementation fidelity of the ICDM model<br>Establish influence of contextual factors on the degree ICDM model implementation fidelity |
| Costs of Implementing the ICDM model          | To estimate the implementation costs of the ICDM model                                           | Ingredient approach to health system costs in four PHC clinics – two facilities per district using The World Health Organization CostIt software 2007.<br>Data sources: Budgets, key informants interviews, direct observations and literature search.<br>Annualize capital costs<br>Adjust all costs for inflation and discount<br>Develop a cost profile for providing each component of the ICDM model | The cost of implementing each of the components of the ICDM model<br>Sensitivity analysis to determine cost drivers in the implementation of the ICDM model.                                             |

1  
2  
3 405 *Ethical conduct of the study:* This study has been approved by the University of Cape  
4 406 Town (Ref: 127/2018) and University of the Witwatersrand (Ref: R14/49) Human  
5 407 Research ethics committees. Approvals have also been received from the Gauteng  
6 408 and the North West Provincial departments of health. The participants for the  
7 409 interviews will be consented individually prior to taking part in the study.

8  
9  
10  
11 410 *Results Dissemination:* The results of this study will be shared with the various  
12 411 stakeholders to inform the implementation of the ICDM model in South Africa and other  
13 412 models of integrated care. Brief summary of results will be presented to the Provincial  
14 413 and districts DOH. The full results will be presented at local research days in each  
15 414 province and district. Facility managers and local clinic staff that participated in the  
16 415 study will be given feedback on the outcomes of the study. The results will also be  
17 416 presented through publications and conference presentations to enhance scientific  
18 417 knowledge. Authorship will be determined by substantial contributions to the study  
19 418 according to the recommendations for the conduct, reporting and publication of  
20 419 research in medical journals. Once the data collection and cleaning is complete, it will  
21 420 be made open and publicly accessible.

22  
23  
24  
25  
26  
27  
28  
29  
30  
31 421  
32 422  
33 423 **Conclusion:** Many health systems are challenged with increased demand for  
34 424 healthcare for chronic diseases. Despite this service need, there is minimal integration  
35 425 of services for the management of chronic diseases resulting in inefficiencies in  
36 426 service delivery, high costs and poor health outcomes. The ICDM model has been  
37 427 developed to address this challenge, the success of which will be influenced by the  
38 428 degree to which the model is accurately implemented. This highlights the need for data  
39 429 to assess the degree of fidelity to the ICDM model intervention, and for data that  
40 430 explores how fidelity of implementation is affected by contextual factors. Data  
41 431 generated from this study will inform integration of chronic care services at the PHC  
42 432 level, and scalability of the ICDM model, of relevance in South Africa and other low  
43 433 and middle-income countries increasingly facing a growing tide of chronic disease  
44 434 multimorbidity.

45  
46  
47  
48  
49  
50  
51  
52  
53  
54 435  
55  
56  
57  
58  
59  
60

## References

1. Kim DJ., Westfall AO., Chamot E. Multimorbidity patterns in HIV-infected patients: the role of obesity in chronic disease clustering. *Immune Defic Syndr* 2012; 61:600-5.
2. The World Bank. Human Development Network. The growing danger of non-communicable diseases. Acting now to reverse course. 2011.
3. Mbanya J., Ramiaya K. Diabetes Mellitus. In: Jamison D. T., Feachem R. G., Makgoba M. W., editors. *Disease and Mortality in Sub-Saharan Africa*. Washington DC: World Bank; 2006.
4. Vorster HH., Venter CS., Wissing MP., Margetts BM. The nutrition and health transition in the North West Province of South Africa: a review of the THUSA study. *Publ Health Nutr* 2005; 8:480 -90.
5. Steyn K., Kazenellenbogen JM., Lombard CJ., Bourne LT. Urbanization and the risk for chronic diseases of lifestyle in the black population of the Cape Peninsula, South Africa. *J Cardiovasc Risk* 1997; 4:135 - 42.
6. Oni T, Unwin N. Why the communicable/non-communicable disease dichotomy is problematic for public health control strategies: implications of multimorbidity for health systems in an era of health transition. *International Health* 2015.
7. Bertram MY., Jaswal AV., Wyk VP., Levitte NS., Hofman KJ. The non-fatal disease burden caused by Type 2 Diabetes in South Africa. *Global Health Action*. 2013; 6
8. France EF., Wyke S., Gunn JM., Mair FS., McLean G., Mercer S. Multimorbidity in primary care: a systematic review of prospective cohort studies. *Br J Gen Pract* 2012; 62:e297-e307.
9. Prados-Torres A, Calderón-Larrañaga A., Hanco-Saavedra J, Poblador-Plou B, van den Akker M. Multimorbidity patterns: a systematic review. *Journal of Clinical Epidemiology* 2014; 67:254-66.
10. Statistics South Africa. Mortality and causes of death in South Africa Findings from death notification Statistics South Africa, Pretoria, South Africa 2014.
11. UNAIDS. HIV and AIDS estimates 2015.
12. Oni T, Youngblood E, Boule A, McGrath N, Wilkinson RJ, Levitt NS. Patterns of HIV, TB, and non-communicable disease multi-morbidity in peri-urban South Africa-a cross sectional study. *BMC Infect Dis*. 2015; 15:s12879-015.
13. Department of Health Free State. The Free State Department of Health: Annual Performance Plan 2015/2016 2016.
14. Nuño R., Coleman K., Bengoa R., Sauto R. Integrated care for chronic conditions: the contribution of the ICCF Framework. *Health Policy* 2012; 105:55-64.
15. World Health Organization. Innovative care for chronic conditions: Building Blocks for Action 2013: Available from: <http://www.who.int/chp/knowledge/publications/icccreport/en/>.
16. National Department of Health of South Africa. Integrated Chronic Disease Management Manual, A step-by-step guide for implementation. South Africa 2012.
17. Proctor EK, Powell BJ, McMillen JC. Implementation strategies: recommendations for specifying and reporting. *Implement Sci* 2013; 8:1748-5908.
18. Mahomed OH, Asmall S, J. Development and implementation of an integrated chronic disease model in South Africa: lessons in the management of change through improving the quality of clinical practice. *Int J of Integr Care* 2015; 15

- 1  
2  
3 482 19. Gray A, Vawda Y, Padarath A, King J, English R. Health Policy and Legislation. In:  
4 483 Padarath A, King J, R E, editors. South African Health Review. Durban, South Africa: Health  
5 484 Systems Trust; 2015.
- 7 485 20. Hunter JR CT, Asmall S, Tucker JM, Ravhengani NM, Mokgalagadi Y. The Ideal Clinic  
8 486 in South Africa: progress and challenges in implementation. In: Padarath A, Barron P, editors  
9 487 South Africa Health Review. Durban, South Africa: Health System Trust2017.
- 11 488 21. Department of Health. Integrated Clinical Services Management Manual. Republic of  
12 489 South Africa2016.
- 13 490 22. Gabert R, Wollum A, Nyembezi A, Petersen Z, Phillips B, Reitsma M, et al. The need  
14 491 for integrated chronic care in South Africa: preliminary lessons from the HealthRise  
15 492 program. 21st International AIDS Conference; Durban, South Africa2016.
- 17 493 23. Aantjes C, Quinlan T, Bunders J. Integration of community home based care  
18 494 programmes within national primary health care revitalisation strategies in Ethiopia,  
19 495 Malawi, South-Africa and Zambia: a comparative assessment. *Globalization and health*.  
20 496 2014; 10:85.
- 22 497 24. Maimela E, Geertruyden JP, Alberts M, Modjadji SE, Meulemans H, Fraeyman J, et al.  
23 498 The perceptions and perspectives of patients and health care providers on chronic diseases  
24 499 management in rural South Africa: a qualitative study. *BMC Health Serv Res*. 2015; 15
- 25 500 25. David H., Peters NT., Tran TA. Implementation research in health: a practical guide.  
26 501 Alliance for Health Policy and Systems, World Health Organization. 2013.
- 28 502 26. Ameh S, Klipstein-Grobusch K, D'Ambruoso L, Kahn K, Tollman SM, Gómez-Olivé X.  
29 503 Effectiveness of an integrated chronic disease management model in improving patients'  
30 504 CD4 count and blood pressure in a rural South African setting: a controlled interrupted time  
31 505 series analysis. 21st International AIDS Conference; Durban South Africa2016.
- 33 506 27. Mahomed OH, Naidoo S, Asmall S, Taylor M. Improving the quality of nurse clinical  
34 507 documentation for chronic patients at primary care clinics: A multifaceted intervention.  
35 508 *Curacionis*. 2015; 38.
- 36 509 28. Ameh S, Klipstein-Grobusch K, D'Ambruoso L, Kahn K, Tollman SM, Gómez-Olivé X.  
37 510 Quality of integrated chronic disease care in rural South Africa:User and provider  
38 511 perspective. 21st International AIDS Conference; Durban South Africa2016.
- 40 512 29. Carroll C., Patterson M., Wood S., Booth A., Rick J., Balain S. A conceptual framework  
41 513 for implementation fidelity. *Implement Sci* 2007; 2
- 43 514 30. Mahomed OH, Asmall S, Freeman M, J. An integrated chronic disease management  
44 515 model: a diagonal approach to health system strengthening in South Africa. *J of Health Care*  
45 516 *Poor Underserved* 2014; 25:1723-9.
- 46 517 31. Massyn N, Peer N, Padarath A, Barron P, Day C. District Health Barometer 2014/15.  
47 518 Durban, South Africa: Health Systems Trust; 2015.
- 48 519 32. Day C, Gray A. Health and related indicators. South Africa: Health Systems Trust2016.
- 50 520 33. Shisana O, Rehle T, Simbayi LC, Zuma K, Jooste S, Zungu N, et al. South African  
51 521 National HIV Prevalence, Incidence and Behaviour Survey, 2012. South Africa2012.
- 52 522 34. I. D. F. International Diabetes Federation. Atlas sixth edition IDF Brussels. 2013.
- 53 523 35. Green H. Use of theoretical and conceptual frameworks in qualitative research.  
54 524 *Nurse Res* 2014; 21:34-8.
- 56 525 36. Moore G, Audrey S, Barker M, Bond L, et. al. Process Evaluation of Complex  
57 526 Interventions. United Kingdom Medical Research Council (MRC) Guidance: UK MRC2008.

- 1  
2  
3 527 37. Craig P., Dieppe P., Macintyre S., Michie S., Nazareth I., Petticrew M. Medical  
4 528 Research Council Guidance:Developing and evaluating complex interventions the new  
5 529 Medical Research Council guidance BMJ 2008; 337  
6  
7 530 38. Moore GF, Audrey S, Barker M, Bond L, Bonell C, Hardeman W, et al. Process  
8 531 evaluation of complex interventions: Medical Research Council guidance. BMJ 2015;  
9 532 350:h1258.  
10  
11 533 39. Sanson-Fisher RW. Diffusion of innovation theory for clinical change. Medical Journal  
12 534 of Australia. 2014; 6.  
13 535 40. Rabarison KM, Bish CL, Massoudi MS, Giles WH. Economic Evaluation Enhances  
14 536 Public Health Decision Making. Frontiers in public health. 2015; 3:164.  
15 537 41. Taghreed A, Moses A, David E. CostIt software. World Health Organization [serial on  
16 538 the Internet]. 2007.  
17  
18 539 42. Mojtaba Vaismoradi, Hannele Turunen, Terese Bondas. Content analysis and  
19 540 thematic analysis: Implications for conducting a qualitative descriptive study. Nursing and  
20 541 Health Sciences. 2013; 15:398 - 405.  
21  
22 542 43. South African Revenue Service. Income Tax Act No. 58 of 1962. Binding General  
23 543 Ruling (Income Tax): No. 8, Wear-and-tear or depreciation allowance. South Africa, 2012.  
24 544  
25 545  
26 546

1  
2  
3 547  
4 548 **Acknowledgements:** We would like to acknowledge the people that have reviewed  
5 549 this protocol and provided feedback: Leslie London, Edina Sinanovic, Maylene Shung  
6 550 King and South African MRC Self-Initiated Research Grant division.  
7 551

8 552 **Funding Statement:** The proposed study outlined in this protocol will be supported  
9 553 by the South African Medical Research Council under a Self-Initiated Research Grant  
10 554 (ID:494184). The views and opinions expressed are those of the author(s) and do not  
11 555 necessarily represent the official views of the SA MRC. The sponsor appointed  
12 556 reviewers have critically assessed the protocol and requested some changes to be  
13 557 done prior to submission to ethics. The sponsor will have no role in data collection,  
14 558 analysis or reporting.  
15 559

16 560 **Author Statement:** LL was involved in the conception, design literature review and  
17 561 writing. OA, MK and TO have contributed to the conception, design and critical review  
18 562 of the manuscript.  
19 563

20 564 **Conflict of Interest:** The authors have no conflict of interest to declare.  
21 565

22 566 **Ethical Issues:** The protocol has been approved by the University of Cape Town and  
23 567 University of the Witwatersrand Human Research ethics committees. Any changes  
24 568 required, will have to be submitted to both ethics committees.  
25 569

26 570 **Word Count:** 3889  
27 571

28 572

## 29 573 **Figures and Tables**

### 30 574 **Figures**

31 575 *Figure 1: Map of South Africa with the ICDM model pilot sites highlighted*  
32 576

33 577 *Figure 2: Integrated Chronic Disease Management Model<sup>16</sup>*  
34 578

35 579 *Figure 3: The Process Evaluation framework for complex interventions<sup>38</sup>*  
36 580

37 581 *Figure 4: Modified Process Evaluation Framework for assessing the fidelity and cost  
38 582 of the ICDM model implementation*

### 39 583 **Tables**

40 584 *Table 2: Summary of study objectives, methods and expected outcomes for assessing  
41 585 the fidelity, impact of contextual factors and costs of the ICDM model implementation*  
42 586  
43 587



1  
2  
3  
4  
5  
6  
7  
8  
9  
10  
11  
12  
13  
14  
15  
16  
17  
18  
19  
20  
21  
22  
23  
24  
25  
26  
27  
28  
29  
30  
31  
32  
33  
34  
35  
36  
37  
38  
39  
40  
41  
42  
43  
44  
45  
46  
47  
48  
49  
50  
51  
52  
53  
54  
55  
56  
57  
58  
59  
60

Figure 1: Map of South Africa with the ICDM model pilot sites highlighted

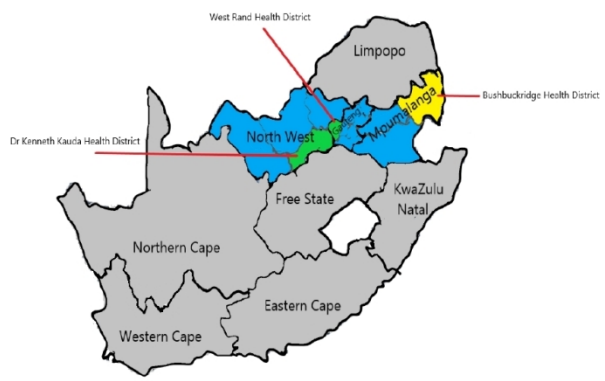

Figure 1: Map of South Africa with the ICDM model pilot sites highlighted  
104x148mm (300 x 300 DPI)

1  
2  
3  
4  
5  
6  
7  
8  
9  
10  
11  
12  
13  
14  
15  
16  
17  
18  
19  
20  
21  
22  
23  
24  
25  
26  
27  
28  
29  
30  
31  
32  
33  
34  
35  
36  
37  
38  
39  
40  
41  
42  
43  
44  
45  
46  
47  
48  
49  
50  
51  
52  
53  
54  
55  
56  
57  
58  
59  
60

Figure 1: Integrated Chronic Disease Management Model<sup>21</sup>

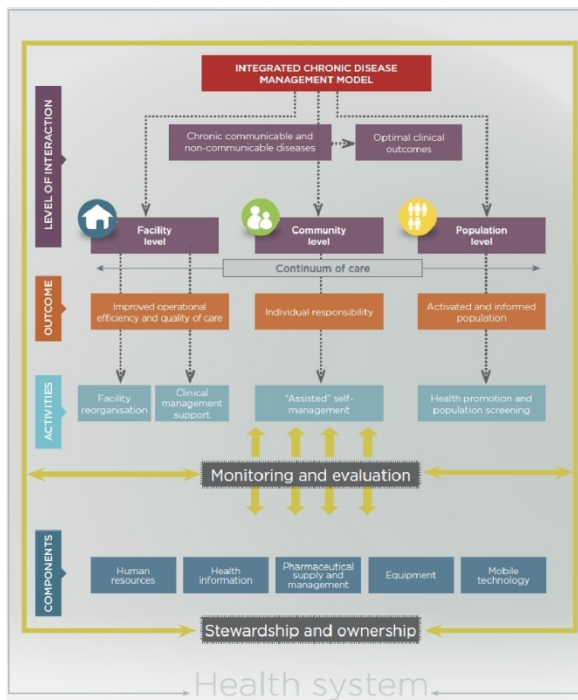

Figure 2: Integrated Chronic Disease Management Model 21

104x148mm (300 x 300 DPI)

1  
2  
3  
4  
5  
6  
7  
8  
9  
10  
11  
12  
13  
14  
15  
16  
17  
18  
19  
20  
21  
22  
23  
24  
25  
26  
27  
28  
29  
30  
31  
32  
33  
34  
35  
36  
37  
38  
39  
40  
41  
42  
43  
44  
45  
46  
47  
48  
49  
50  
51  
52  
53  
54  
55  
56  
57  
58  
59  
60

Figure 3: The Process Evaluation framework for complex interventions<sup>38</sup>

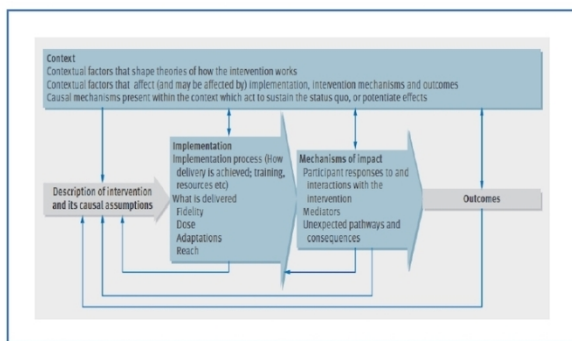

Figure 3: The Process Evaluation framework for complex interventions 38

90x127mm (300 x 300 DPI)

1  
2  
3  
4  
5  
6  
7  
8  
9  
10  
11  
12  
13  
14  
15  
16  
17  
18  
19  
20  
21  
22  
23  
24  
25  
26  
27  
28  
29  
30  
31  
32  
33  
34  
35  
36  
37  
38  
39  
40  
41  
42  
43  
44  
45  
46  
47  
48  
49  
50  
51  
52  
53  
54  
55  
56  
57  
58  
59  
60

Figure 4: Modified Process Evaluation Framework for assessing the fidelity and cost of the ICDM model implementation

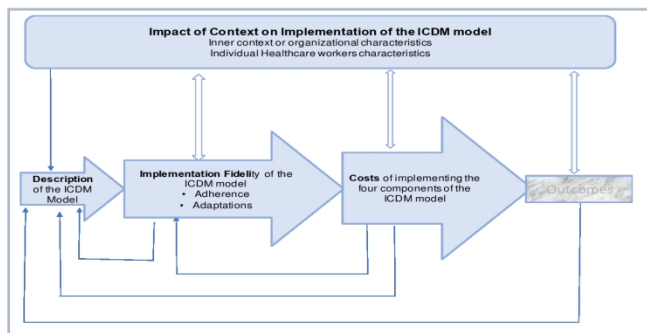

Figure 4: Modified Process Evaluation Framework for assessing the fidelity and cost of the ICDM model implementation

139x198mm (300 x 300 DPI)



SPIRIT 2013 Checklist: Recommended items to address in a clinical trial protocol and related documents\*

| Section/item                      | Item No | Description                                                                                                                                                                                                                                                                                        |
|-----------------------------------|---------|----------------------------------------------------------------------------------------------------------------------------------------------------------------------------------------------------------------------------------------------------------------------------------------------------|
| <b>Administrative information</b> |         |                                                                                                                                                                                                                                                                                                    |
| Title                             | 1       | Descriptive title identifying the study design, population, interventions, and, if applicable, trial acronym ✓ - pg. 1                                                                                                                                                                             |
| Trial registration                | 2a      | Trial identifier and registry name. If not yet registered, name of intended registry – <b>N/A</b>                                                                                                                                                                                                  |
|                                   | 2b      | All items from the World Health Organization Trial Registration Data Set. – <b>N/A</b>                                                                                                                                                                                                             |
| Protocol version                  | 3       | Date and version identifier - ✓ - pg.1                                                                                                                                                                                                                                                             |
| Funding                           | 4       | Sources and types of financial, material, and other support ✓ - pg.18                                                                                                                                                                                                                              |
| Roles and responsibilities        | 5a      | Names, affiliations, and roles of protocol contributors - ✓ - pg.18                                                                                                                                                                                                                                |
|                                   | 5b      | Name and contact information for the trial sponsor <b>N/A</b>                                                                                                                                                                                                                                      |
|                                   | 5c      | Role of study sponsor and funders, if any, in study design; collection, management, analysis, and interpretation of data; writing of the report; and the decision to submit the report for publication, including whether they will have ultimate authority over any of these activities ✓ - pg.18 |
|                                   | 5d      | Composition, roles, and responsibilities of the coordinating centre, steering committee, endpoint adjudication committee, data management team, and other individuals or groups overseeing the trial, if applicable (see Item 21a for data monitoring committee) <b>N/A</b>                        |
| <b>Introduction</b>               |         |                                                                                                                                                                                                                                                                                                    |
| Background and rationale          | 6a      | Description of research question and justification for undertaking the trial, including summary of relevant studies (published and unpublished) examining benefits and harms for each intervention ✓ - pg. 2-4                                                                                     |
|                                   | 6b      | Explanation for choice of comparators – <b>N/A</b>                                                                                                                                                                                                                                                 |
| Objectives                        | 7       | Specific objectives or hypotheses ✓ - pg. 7                                                                                                                                                                                                                                                        |

1  
2  
3  
4  
5  
6  
7  
8  
9  
10  
11  
12  
13  
14  
15  
16  
17  
18  
19  
20  
21  
22  
23  
24  
25  
26  
27  
28  
29  
30  
31  
32  
33  
34  
35  
36  
37  
38  
39  
40  
41  
42  
43  
44  
45  
46  
47  
48  
49  
50  
51  
52  
53  
54  
55  
56  
57  
58  
59  
60

|              |   |                                                                                                                                                                                                                        |
|--------------|---|------------------------------------------------------------------------------------------------------------------------------------------------------------------------------------------------------------------------|
| Trial design | 8 | Description of trial design including type of trial (eg, parallel group, crossover, factorial, single group), allocation ratio, and framework (eg, superiority, equivalence, noninferiority, exploratory) – <b>N/A</b> |
|--------------|---|------------------------------------------------------------------------------------------------------------------------------------------------------------------------------------------------------------------------|

### **Methods: Participants, interventions, and outcomes**

|                      |     |                                                                                                                                                                                                                                                                                                                                                                                                 |
|----------------------|-----|-------------------------------------------------------------------------------------------------------------------------------------------------------------------------------------------------------------------------------------------------------------------------------------------------------------------------------------------------------------------------------------------------|
| Study setting        | 9   | Description of study settings (eg, community clinic, academic hospital) and list of countries where data will be collected. Reference to where list of study sites can be obtained ✓ - pg. 7-8                                                                                                                                                                                                  |
| Eligibility criteria | 10  | Inclusion and exclusion criteria for participants. If applicable, eligibility criteria for study centres and individuals who will perform the interventions (eg, surgeons, psychotherapists) ✓ - pg. 9-10                                                                                                                                                                                       |
| Interventions        | 11a | Interventions for each group with sufficient detail to allow replication, including how and when they will be administered – N/A                                                                                                                                                                                                                                                                |
|                      | 11b | Criteria for discontinuing or modifying allocated interventions for a given trial participant (eg, drug dose change in response to harms, participant request, or improving/worsening disease) - N/A                                                                                                                                                                                            |
|                      | 11c | Strategies to improve adherence to intervention protocols, and any procedures for monitoring adherence (eg, drug tablet return, laboratory tests) - N/A                                                                                                                                                                                                                                         |
|                      | 11d | Relevant concomitant care and interventions that are permitted or prohibited during the trial – N/A                                                                                                                                                                                                                                                                                             |
| Outcomes             | 12  | Primary, secondary, and other outcomes, including the specific measurement variable (eg, systolic blood pressure), analysis metric (eg, change from baseline, final value, time to event), method of aggregation (eg, median, proportion), and time point for each outcome. Explanation of the clinical relevance of chosen efficacy and harm outcomes is strongly recommended ✓ - pg. 11 – 12. |
| Participant timeline | 13  | Time schedule of enrolment, interventions (including any run-ins and washouts), assessments, and visits for participants. A schematic diagram is highly recommended (see Figure) N/A                                                                                                                                                                                                            |
| Sample size          | 14  | Estimated number of participants needed to achieve study objectives and how it was determined, including clinical and statistical assumptions supporting any sample size calculations – N/A                                                                                                                                                                                                     |
| Recruitment          | 15  | Strategies for achieving adequate participant enrolment to reach target sample size                                                                                                                                                                                                                                                                                                             |

### **Methods: Assignment of interventions (for controlled trials) N/A**

Allocation:

|    |                |     |                                                                         |
|----|----------------|-----|-------------------------------------------------------------------------|
| 1  |                |     |                                                                         |
| 2  | Sequence       | 16a | Method of generating the allocation sequence (eg, computer-             |
| 3  | generation     |     | generated random numbers), and list of any factors for stratification.  |
| 4  |                |     | To reduce predictability of a random sequence, details of any planned   |
| 5  |                |     | restriction (eg, blocking) should be provided in a separate document    |
| 6  |                |     | that is unavailable to those who enrol participants or assign           |
| 7  |                |     | interventions                                                           |
| 8  |                |     |                                                                         |
| 9  |                |     |                                                                         |
| 10 | Allocation     | 16b | Mechanism of implementing the allocation sequence (eg, central          |
| 11 | concealment    |     | telephone; sequentially numbered, opaque, sealed envelopes),            |
| 12 | mechanism      |     | describing any steps to conceal the sequence until interventions are    |
| 13 |                |     | assigned                                                                |
| 14 |                |     |                                                                         |
| 15 | Implementation | 16c | Who will generate the allocation sequence, who will enrol participants, |
| 16 |                |     | and who will assign participants to interventions                       |
| 17 |                |     |                                                                         |
| 18 | Blinding       | 17a | Who will be blinded after assignment to interventions (eg, trial        |
| 19 | (masking)      |     | participants, care providers, outcome assessors, data analysts), and    |
| 20 |                |     | how                                                                     |
| 21 |                |     |                                                                         |
| 22 |                |     |                                                                         |
| 23 |                | 17b | If blinded, circumstances under which unblinding is permissible, and    |
| 24 |                |     | procedure for revealing a participant's allocated intervention during   |
| 25 |                |     | the trial                                                               |
| 26 |                |     |                                                                         |
| 27 |                |     |                                                                         |

### Methods: Data collection, management, and analysis

|    |                 |     |                                                                          |
|----|-----------------|-----|--------------------------------------------------------------------------|
| 28 |                 |     |                                                                          |
| 29 |                 |     |                                                                          |
| 30 | Data collection | 18a | Plans for assessment and collection of outcome, baseline, and other      |
| 31 | methods         |     | trial data, including any related processes to promote data quality (eg, |
| 32 |                 |     | duplicate measurements, training of assessors) and a description of      |
| 33 |                 |     | study instruments (eg, questionnaires, laboratory tests) along with      |
| 34 |                 |     | their reliability and validity, if known. Reference to where data        |
| 35 |                 |     | collection forms can be found, if not in the protocol ✓ - pg. 11-12      |
| 36 |                 |     |                                                                          |
| 37 |                 |     |                                                                          |
| 38 |                 | 18b | Plans to promote participant retention and complete follow-up,           |
| 39 |                 |     | including list of any outcome data to be collected for participants who  |
| 40 |                 |     | discontinue or deviate from intervention protocols – N/A                 |
| 41 |                 |     |                                                                          |
| 42 | Data            | 19  | Plans for data entry, coding, security, and storage, including any       |
| 43 | management      |     | related processes to promote data quality (eg, double data entry;        |
| 44 |                 |     | range checks for data values). Reference to where details of data        |
| 45 |                 |     | management procedures can be found, if not in the protocol ✓ - pg.       |
| 46 |                 |     | 11-12                                                                    |
| 47 |                 |     |                                                                          |
| 48 |                 |     |                                                                          |
| 49 | Statistical     | 20a | Statistical methods for analysing primary and secondary outcomes.        |
| 50 | methods         |     | Reference to where other details of the statistical analysis plan can be |
| 51 |                 |     | found, if not in the protocol - ✓ - pg. 11-12                            |
| 52 |                 |     |                                                                          |
| 53 |                 |     |                                                                          |
| 54 |                 | 20b | Methods for any additional analyses (eg, subgroup and adjusted           |
| 55 |                 |     | analyses) ✓ - pg. 11 -12                                                 |
| 56 |                 |     |                                                                          |
| 57 |                 | 20c | Definition of analysis population relating to protocol non-adherence     |
| 58 |                 |     | (eg, as randomised analysis), and any statistical methods to handle      |
| 59 |                 |     | missing data (eg, multiple imputation) N/A                               |
| 60 |                 |     |                                                                          |

## Methods: Monitoring

|                                                                                                                               |                 |     |                                                                                                                                                                                                                                                                                                                                             |
|-------------------------------------------------------------------------------------------------------------------------------|-----------------|-----|---------------------------------------------------------------------------------------------------------------------------------------------------------------------------------------------------------------------------------------------------------------------------------------------------------------------------------------------|
| 1<br>2<br>3<br>4<br>5<br>6<br>7<br>8<br>9<br>10<br>11<br>12<br>13<br>14<br>15<br>16<br>17<br>18<br>19<br>20<br>21<br>22<br>23 | Data monitoring | 21a | Composition of data monitoring committee (DMC); summary of its role and reporting structure; statement of whether it is independent from the sponsor and competing interests; and reference to where further details about its charter can be found, if not in the protocol. Alternatively, an explanation of why a DMC is not needed - N/A |
| 24<br>25<br>26<br>27<br>28<br>29<br>30<br>31<br>32<br>33<br>34                                                                | Harms           | 22  | Plans for collecting, assessing, reporting, and managing solicited and spontaneously reported adverse events and other unintended effects of trial interventions or trial conduct                                                                                                                                                           |
| 35<br>36<br>37<br>38<br>39<br>40<br>41<br>42<br>43<br>44<br>45                                                                | Auditing        | 23  | Frequency and procedures for auditing trial conduct, if any, and whether the process will be independent from investigators and the sponsor                                                                                                                                                                                                 |

## Ethics and dissemination

|                                                                                                                                                                                                                |                               |     |                                                                                                                                                                                                                                            |
|----------------------------------------------------------------------------------------------------------------------------------------------------------------------------------------------------------------|-------------------------------|-----|--------------------------------------------------------------------------------------------------------------------------------------------------------------------------------------------------------------------------------------------|
| 26<br>27<br>28<br>29<br>30<br>31<br>32<br>33<br>34<br>35<br>36<br>37<br>38<br>39<br>40<br>41<br>42<br>43<br>44<br>45<br>46<br>47<br>48<br>49<br>50<br>51<br>52<br>53<br>54<br>55<br>56<br>57<br>58<br>59<br>60 | Research ethics approval      | 24  | Plans for seeking research ethics committee/institutional review board (REC/IRB) approval ✓ - pg. 1                                                                                                                                        |
| 26<br>27<br>28<br>29<br>30<br>31<br>32<br>33<br>34<br>35<br>36<br>37<br>38<br>39<br>40<br>41<br>42<br>43<br>44<br>45<br>46<br>47<br>48<br>49<br>50<br>51<br>52<br>53<br>54<br>55<br>56<br>57<br>58<br>59<br>60 | Protocol amendments           | 25  | Plans for communicating important protocol modifications (eg, changes to eligibility criteria, outcomes, analyses) to relevant parties (eg, investigators, REC/IRBs, trial participants, trial registries, journals, regulators) ✓ - pg. 1 |
| 26<br>27<br>28<br>29<br>30<br>31<br>32<br>33<br>34<br>35<br>36<br>37<br>38<br>39<br>40<br>41<br>42<br>43<br>44<br>45<br>46<br>47<br>48<br>49<br>50<br>51<br>52<br>53<br>54<br>55<br>56<br>57<br>58<br>59<br>60 | Consent or assent             | 26a | Who will obtain informed consent or assent from potential trial participants or authorised surrogates, and how (see Item 32) N/A                                                                                                           |
| 26<br>27<br>28<br>29<br>30<br>31<br>32<br>33<br>34<br>35<br>36<br>37<br>38<br>39<br>40<br>41<br>42<br>43<br>44<br>45<br>46<br>47<br>48<br>49<br>50<br>51<br>52<br>53<br>54<br>55<br>56<br>57<br>58<br>59<br>60 | Confidentiality               | 27  | Additional consent provisions for collection and use of participant data and biological specimens in ancillary studies, if applicable N/A                                                                                                  |
| 26<br>27<br>28<br>29<br>30<br>31<br>32<br>33<br>34<br>35<br>36<br>37<br>38<br>39<br>40<br>41<br>42<br>43<br>44<br>45<br>46<br>47<br>48<br>49<br>50<br>51<br>52<br>53<br>54<br>55<br>56<br>57<br>58<br>59<br>60 | Confidentiality               | 27  | How personal information about potential and enrolled participants will be collected, shared, and maintained in order to protect confidentiality before, during, and after the trial ✓ - pg. 11                                            |
| 26<br>27<br>28<br>29<br>30<br>31<br>32<br>33<br>34<br>35<br>36<br>37<br>38<br>39<br>40<br>41<br>42<br>43<br>44<br>45<br>46<br>47<br>48<br>49<br>50<br>51<br>52<br>53<br>54<br>55<br>56<br>57<br>58<br>59<br>60 | Declaration of interests      | 28  | Financial and other competing interests for principal investigators for the overall trial and each study site ✓ - pg. 1                                                                                                                    |
| 26<br>27<br>28<br>29<br>30<br>31<br>32<br>33<br>34<br>35<br>36<br>37<br>38<br>39<br>40<br>41<br>42<br>43<br>44<br>45<br>46<br>47<br>48<br>49<br>50<br>51<br>52<br>53<br>54<br>55<br>56<br>57<br>58<br>59<br>60 | Access to data                | 29  | Statement of who will have access to the final trial dataset, and disclosure of contractual agreements that limit such access for investigators ✓ - pg. 1                                                                                  |
| 26<br>27<br>28<br>29<br>30<br>31<br>32<br>33<br>34<br>35<br>36<br>37<br>38<br>39<br>40<br>41<br>42<br>43<br>44<br>45<br>46<br>47<br>48<br>49<br>50<br>51<br>52<br>53<br>54<br>55<br>56<br>57<br>58<br>59<br>60 | Ancillary and post-trial care | 30  | Provisions, if any, for ancillary and post-trial care, and for compensation to those who suffer harm from trial participation -N/A                                                                                                         |



- 1  
2  
3  
4  
5  
6  
7  
8  
9  
10  
11  
12  
13  
14  
15
- |                         |     |                                                                                                                                                                                                                                                                                                   |
|-------------------------|-----|---------------------------------------------------------------------------------------------------------------------------------------------------------------------------------------------------------------------------------------------------------------------------------------------------|
| Dissemination<br>policy | 31a | Plans for investigators and sponsor to communicate trial results to participants, healthcare professionals, the public, and other relevant groups (eg, via publication, reporting in results databases, or other data sharing arrangements), including any publication restrictions<br>✓ - pg. 12 |
|                         | 31b | Authorship eligibility guidelines and any intended use of professional writers - ✓ - pg. 13                                                                                                                                                                                                       |
|                         | 31c | Plans, if any, for granting public access to the full protocol, participant-level dataset, and statistical code ✓ - pg. 13                                                                                                                                                                        |

## 16 Appendices

- 17  
18  
19  
20  
21  
22  
23  
24
- |                               |    |                                                                                                                                                                                                      |
|-------------------------------|----|------------------------------------------------------------------------------------------------------------------------------------------------------------------------------------------------------|
| Informed consent<br>materials | 32 | Model consent form and other related documentation given to participants and authorised surrogates – Appendix 1                                                                                      |
| Biological<br>specimens       | 33 | Plans for collection, laboratory evaluation, and storage of biological specimens for genetic or molecular analysis in the current trial and for future use in ancillary studies, if applicable – N/A |

---

25 \*It is strongly recommended that this checklist be read in conjunction with the SPIRIT 2013  
26 Explanation & Elaboration for important clarification on the items. Amendments to the  
27 protocol should be tracked and dated. The SPIRIT checklist is copyrighted by the SPIRIT  
28 Group under the Creative Commons "[Attribution-NonCommercial-NoDerivs 3.0 Unported](https://creativecommons.org/licenses/by-nc-nd/3.0/)"  
29 license.  
30  
31  
32  
33  
34  
35  
36  
37  
38  
39  
40  
41  
42  
43  
44  
45  
46  
47  
48  
49  
50  
51  
52  
53  
54  
55  
56  
57  
58  
59  
60

# BMJ Open

## Process evaluation of Fidelity and Costs of implementing the Integrated Chronic Disease Management Model in South Africa: Mixed Methods Study Protocol

|                                 |                                                                                                                                                                                                                                                                                                                                                                                                                                                                                      |
|---------------------------------|--------------------------------------------------------------------------------------------------------------------------------------------------------------------------------------------------------------------------------------------------------------------------------------------------------------------------------------------------------------------------------------------------------------------------------------------------------------------------------------|
| Journal:                        | <i>BMJ Open</i>                                                                                                                                                                                                                                                                                                                                                                                                                                                                      |
| Manuscript ID                   | bmjopen-2019-029277.R2                                                                                                                                                                                                                                                                                                                                                                                                                                                               |
| Article Type:                   | Protocol                                                                                                                                                                                                                                                                                                                                                                                                                                                                             |
| Date Submitted by the Author:   | 08-May-2019                                                                                                                                                                                                                                                                                                                                                                                                                                                                          |
| Complete List of Authors:       | Lebina, Limakatso; University of the Witwatersrand, Perinatal HIV Research Unit; University of Cape Town Faculty of Health Sciences, School of Public Health and Family Medicine<br>Alaba, Olufunke; University of Cape Town, School of Public Health and Family Medicine<br>Kawonga, Mary; University of the Witwatersrand, School of Public Health Oni, Tolu; University of Cape Town, School of Public Health and Family Medicine; University of Cambridge, MRC Epidemiology Unit |
| <b>Primary Subject Heading</b>: | Health services research                                                                                                                                                                                                                                                                                                                                                                                                                                                             |
| Secondary Subject Heading:      | Patient-centred medicine, Public health, Evidence based practice                                                                                                                                                                                                                                                                                                                                                                                                                     |
| Keywords:                       | implement, ICDM, intervention evaluation                                                                                                                                                                                                                                                                                                                                                                                                                                             |
|                                 |                                                                                                                                                                                                                                                                                                                                                                                                                                                                                      |

SCHOLARONE™  
Manuscripts

1  
2  
3 1 **Process evaluation of Fidelity and Costs of implementing the Integrated**  
4 2 **Chronic Disease Management Model in South Africa: Mixed Methods Study**  
5 3 **Protocol**  
6 4  
7 5  
8 6

9 6 Version 2.0, Dated 06 April 2019  
10 7

11 8 1. Limakatso Lebina (MBChB, MPH)\* (Corresponding author)

12 9 Affiliations:

13 10 Perinatal HIV Research Unit (PHRU), SA MRC Soweto Matlosana Collaborating  
14 11 Centre for HIV/AIDS and TB, Faculty of Health Sciences, University of the  
15 12 Witwatersrand, Johannesburg, South Africa;

16 13 School of Public Health and Family Medicine, University of Cape Town

17 14 Email: lebinal@phru.co.za

18 15 2. Olufunke A. Alaba (BSc, MSc, PhD)

19 16 Affiliation: School of Public Health and Family Medicine, University of Cape Town

20 17 Email: olufunke.alaba@uct.ac.za

21 18 3. Mary Kawonga (BSc, MBChB, DipHSM, PhD)

22 19 Affiliation: School of Public Health, University of the Witwatersrand

23 20 Email: Mary.Kawonga@wits.ac.za

24 21 4. Tolu Oni (MBBS, MRCP, MPH, FCPHM, MD(Res))

25 22 Affiliation: School of Public Health and Family Medicine, University of Cape Town;

26 23 MRC Epidemiology Unit, University of Cambridge

27 24 Email: Tolu.Oni@mrc-epid.cam.ac.uk  
28  
29  
30  
31  
32

33 27  
34 28  
35 29 **Keywords: implementation, ICDM model, intervention evaluation**  
36 30  
37 31  
38 32  
39  
40  
41  
42  
43  
44  
45  
46  
47  
48  
49  
50  
51  
52  
53  
54  
55  
56  
57  
58  
59  
60

1  
2  
3 **Abstract**  
4

5 **Introduction:** The South African Department of health has developed and  
6 implemented the Integrated Chronic Disease Management (ICDM) model to respond  
7 to the increased utilization of primary healthcare (PHC) services due to a surge of non-  
8 communicable diseases co-existing with a high prevalence of communicable  
9 diseases. However, some of the expected outcomes on implementing the ICDM model  
10 have not been achieved. The aims of this study are to assess if the observed sub-  
11 optimal outcomes of the ICDM model implementation are due to lack of fidelity to the  
12 ICDM model; to examine the contextual factors associated with the implementation  
13 fidelity, and to calculate implementation costs.  
14  
15  
16  
17  
18  
19  
20

21 **Methods and Analysis:** A process evaluation, mixed methods study in sixteen pilot  
22 clinics from two health districts to assess the degree of fidelity to four major  
23 components of the ICDM model. Activity scores will be summed per component and  
24 overall fidelity score will be calculated by summing the various component scores, and  
25 compared between components, facilities and districts. Multivariate analysis will be  
26 used to examine the association between contextual factors and the degree of fidelity,  
27 individual and team characteristics, facility features, and organizational culture  
28 indicators will be included in the regression. Health system financial and economic  
29 costs of implementing the four components of the ICDM model will be calculated using  
30 an ingredient approach. The unit of implementation costs will be by activity of each of  
31 the major components of the ICDM model. Sensitivity analysis will be carried out using  
32 clinic size, degree of fidelity, and different inflation situations.  
33  
34  
35  
36  
37  
38  
39  
40  
41  
42  
43

44 **Ethics and Dissemination:** The protocol has been approved by the University of  
45 Cape Town and University of the Witwatersrand Human Research ethics committees.  
46 The results of the study will be shared with the department of health, participating  
47 health facilities and the through scientific publications and conference presentations.  
48  
49  
50  
51  
52  
53  
54  
55  
56  
57  
58  
59  
60  
61

## 62 **Strengths and Limitations of this study**

- 63 • This study uses implementation research principles to provide data on the  
64 degree of fidelity to the ICDM model for optimizing the model
- 65 • Process evaluation will provide an indication of how the ICDM model has been  
66 modified in different contexts can explain variability in the implementation  
67 outcomes.
- 68 • Implementation costs assessments are essential in public health programs to  
69 inform resource allocation during planning and budgeting and to inform  
70 economic evaluations
- 71 • The reliance on the service provider to accurately provide information on the  
72 implementation activities or insufficiencies of those activities is a limitation of  
73 this study.
- 74 • Although the clinics may not be representative of all districts and clinics in the  
75 country, the results of this study could be applied to clinics similar in size or  
76 patient load and other integrated disease management models.  
77

78  
79  
80  
81

## 82 Introduction

83  
84 Chronic diseases and multi-morbidity is increasing in developing countries due to  
85 epidemiological transition of increasing prevalence of non-communicable diseases  
86 (NCDs) in the presence of rampant infectious diseases<sup>1,2</sup>. By 2025, it is estimated  
87 that the burden of NCDs in sub-Saharan Africa will be higher than that of  
88 communicable diseases (CD)<sup>3</sup>. The increase in urbanization, economic development,  
89 aging, decrease of physical activity and poor dietary options are some of the  
90 contributing factors to the increasing prevalence of NCDs in developing countries<sup>4, 5</sup>.  
91 There is also a complex interaction of risk factors, management and health outcomes  
92 between NCDs and CDs, resulting a rise in chronic disease mulitmorbidty<sup>6,7</sup>. Multi-  
93 morbidity often results in reduced levels of physical capability, high rates of health  
94 services utilization and attendant costs and higher mortality rates<sup>8,9</sup>. The double  
95 burden (NCDs and CDs) of diseases is costly to the health systems (increased  
96 utilization, medication), the economies, households and individuals<sup>2</sup>. Therefore,  
97 chronic disease management needs to be comprehensive and take into consideration  
98 these interactions in disease prevention, management and control.

99  
100 In South Africa, the current leading health problems are NCDs, accounting for 51.3%  
101 of all deaths, followed by CDs 38.4%, and injuries 10.3%<sup>10</sup>. South Africa like many  
102 Sub-Saharan African countries has been severely affected by the HIV/AIDS epidemic,  
103 with 7.1 million people living with HIV; and 18.9% of people between the ages of 15-  
104 49years being HIV infected<sup>11</sup>. As a result, there is an increase in the prevalence of  
105 multi-morbidity<sup>12</sup>. Tuberculosis (TB), Human Immune Deficiency Syndrome (HIV) and  
106 NCDs (mainly Hypertension (HPT) and Diabetes Mellitus (DM) ) account for 45% of  
107 all primary health care consultations, with a multi-morbidity prevalence of 22.6%<sup>9,13</sup>.

108  
109 Unresponsive health systems often provide services that are not aligned with the  
110 health requirements of the population being served<sup>14</sup>. A more comprehensive chronic  
111 disease management model, combining both CDs and NCDs that reduces health  
112 utilization and promotes self-management is one of the strategies that have been  
113 recommended to address the challenges associated with the management of  
114 multimorbid chronic diseases<sup>2, 14</sup>. The chronic care model (CCM) and Innovative Care  
115 for Chronic Conditions (ICCC) framework have been recommended as health system

1  
2  
3 116 approaches to deal with multi-morbidity<sup>15</sup>. However, there have been significant  
4  
5 117 resources and strategies allocated to the implementation of HIV programs and  
6  
7 118 consequently the non-communicable chronic diseases have been overlooked. To  
8  
9 119 rectify this imbalance, the South African National Department of Health developed and  
10  
11 120 has begun implementation of the Integrated Chronic Disease Management (ICDM)  
12  
13 121 model in order to improve efficiencies and quality of care in primary health care clinics  
14  
15 122 for patients with chronic diseases<sup>16</sup>.

16 123

### 17 124 **Integrated Chronic Disease Management Model**

18 125

19  
20 126 The ICDM model was piloted from 2011 in 42 clinics from three health districts in three  
21  
22 127 different provinces (Figure 1) of South Africa as follows: West Rand in Gauteng  
23  
24 128 Province, Bushbuckridge in Mpumalanga and Dr. Kenneth Kaunda in North West  
25  
26 129 Province<sup>17,18</sup>. As part of a broader national approach to revitalize primary health care  
27  
28 130 (PHC) services, reduce fragmentation of services and ensure that each PHC facility  
29  
30 131 meets national minimum standards, the “ideal clinic” initiative was also started in  
31  
32 132 2013<sup>19</sup>. The principles of the “ideal clinic” incorporate the majority of the activities  
33  
34 133 required for ICDM implementation and provides standard operating procedures for the  
35  
36 134 Ideal Clinic Realisation and Maintenance (ICRM) programme<sup>20, 21</sup>. One of the  
37  
38 135 components of the ICRM programme is Integrated Clinical Services Management  
39  
40 136 (ICSM) which focuses on health services being structured in four (acute, chronic,  
41  
42 137 preventative and promotive and health support) streams.<sup>20, 21</sup> The principles of the  
43  
44 138 ICRM, ICSM and the ICDM model cover integration of services, good administrative  
45  
46 139 processes, functional infrastructure and equipment, adequate personnel, ensuring  
47  
48 140 adequate levels of medicines and supplies and the use of applicable protocols and  
49  
50 141 guidelines in diseases management<sup>19-21</sup>.

51 142

52  
53 143 The four major components (action points) of the ICDM implementation are: facility re-  
54  
55 144 organization for efficiency, clinical supportive management, assisted self-support and  
56  
57 145 strengthening of support systems (Figure 2)<sup>16</sup>. The ICDM priority and core standards  
58  
59 146 are 1) improving the values and attitudes of staff, 2) patient safety and security and  
60  
147 infection prevention and control, and 3) availability of medicines and supplies<sup>16</sup>.  
148 Assuming full implementation of the ICDM as recommended, the expected outcomes  
149 include improved operational efficiency and quality of care, improved individual

1  
2  
3 150 responsibility towards their health and an activated and informed community<sup>16</sup>. The  
4  
5 151 ICDM model also provides guidelines on booking systems for patients with chronic  
6  
7 152 diseases, clinic flow, organization of waiting areas and consultation rooms and  
8  
9 153 dispensing medication practices that promote adherence and minimize medication  
10  
11 154 shortages. In order to avoid fragmentation of services, the ICDM recommends a multi-  
12  
13 155 disciplinary treating team to provide care to all patients with chronic illnesses and be  
14  
15 156 trained on how to assess and manage drug-drug interactions and disease interactions.  
16  
17 157 Mentoring, supervision and training of the PHC nurses to be provided the district  
18  
19 158 Clinical Specialist Team (DCST)<sup>16</sup>. The DCST other responsibilities include  
20  
21 159 monitoring of patient clinical outcomes through clinical audits and strengthening of  
22  
23 160 referral systems for complicated patients<sup>16</sup>. The components or building blocks for  
24  
25 161 ICDM model include human resources, health information, mobile technology,  
26  
27 162 equipment and pharmaceutical supply and management<sup>16</sup>.

28  
29 163  
30  
31 164 **The ICDM Model Pilot Phase Implementation:** The pilot phase was supported with  
32  
33 165 quality improvement reviews and consultation with all staff members at the facility-,  
34  
35 166 district- and province-levels to refine the model even further<sup>18</sup>. Some of the  
36  
37 167 implementation challenges identified in these consultations were lack of key  
38  
39 168 equipment, an emphasis on curative health services with minimal focus on prevention,  
40  
41 169 the ill-defined role of community health care workers and delayed formation of out of  
42  
43 170 facility chronic medication collection sites<sup>18</sup>. Lack for these necessary building blocks  
44  
45 171 for the ICDM model has resulted in the implementation of hybrids of the original  
46  
47 172 model<sup>18</sup>. The limitations of the ICDM model identified include its focus on secondary  
48  
49 173 and tertiary prevention of disease within the healthcare facilities, and the lack of  
50  
51 174 guidelines on social and environmental changes for the prevention of risk factors and  
52  
53 175 onset of chronic diseases<sup>16</sup>.

### 54 176 55 177 **Management of Chronic Conditions in PHC Facilities**

56  
57 178 An evaluation of PHC services in South Africa showed low rates of diagnosis for  
58  
59 179 chronic diseases, and the few that are diagnosed, are not managed appropriately and  
60  
180 do not achieve the treatment targets<sup>22,23</sup>. The lack of key equipment in PHC clinics to  
181  
182 diagnose and monitor total cholesterol, blood pressure and blood glucose contribute  
183  
184 these challenges, with patients reporting the need to travel to higher levels of care to  
185  
186 access certain medication and diagnostic tests<sup>22</sup>. Additional barriers included the



1  
2  
3 184 insufficient consultation time that patients report with their healthcare providers even  
4  
5 185 after long waiting periods at the facility due to high volumes of patients<sup>22</sup>; poor  
6  
7 186 knowledge on chronic disease, shortage of medication and shortage of healthcare  
8  
9 187 workers resulting in long waiting periods at PHC clinics<sup>24</sup>. The nurses knowledge of  
10  
11 188 chronic diseases was also found to be poor due to inadequate training, unavailability  
12  
13 189 of guidelines and lack of supervision<sup>24</sup>.

14 190

15 191 The implementation of an innovative intervention can be affected by the design of the  
16  
17 192 intervention, context and or implementation outcomes<sup>25</sup>. New innovative interventions  
18  
19 193 could fail to achieve intended objectives because of implementation barriers or failures  
20  
21 194 in the design<sup>25</sup>. The observed impact of the ICDM model in the management of chronic  
22  
23 195 diseases has been an improvement in the patients' records, compliance with clinical  
24  
25 196 guidelines and health outcomes for patients on antiretroviral medication but not those  
26  
27 197 on hypertension treatment<sup>26,27</sup>. Irregular supplies and stock-outs of hypertension  
28  
29 198 medication was also not improved after the implementation of the ICDM model<sup>28</sup>. The  
30  
31 199 patients' perspectives on the ICDM model inconveniences were a non-flexible  
32  
33 200 appointment system that affected access to services, long waiting times because of  
34  
35 201 personnel shortages and stigmatization of patients that are visited by community  
36  
37 202 healthcare workers<sup>28</sup>. However, it is not clear whether these observed and perceived  
38  
39 203 gains and shortcomings are as a result of the inherent faults in the design of the model  
40  
41 204 or failure to adhere to the prescribed activities and/or the impact of contextual factors.

42 205

43 206 The successful implementation of the ICDM model requires a high degree of fidelity to  
44  
45 207 the recommended processes of delivering health care services with clear intervention  
46  
47 208 priorities and expected outcomes<sup>29,30</sup>. Although monitoring and evaluation tools exist  
48  
49 209 for the ICDM model implementation, they do not provide data on implementation  
50  
51 210 outcomes such as adoption, fidelity, penetration, acceptability, sustainability and  
52  
53 211 costs. Process evaluation of the ICDM model implementation would optimize practice  
54  
55 212 of the four major components and scale-up of the model, and the quality of care for  
56  
57 213 individuals affected by chronic illness, especially those with multi-morbidity.

58 214

59 215 Implementation of any intervention within a large complex health system is generally  
60  
216 unpredictable. An assessment of fidelity on the implementation of the model will  
217  
218 additionally measure quality of practice for continuous improvement, identify any

1  
2  
3 218 innovations that can improve models' processes and support systematic  
4  
5 219 implementation of the model. Although the implementation of the ICDM model was  
6  
7 220 subsequently followed by the ICRM programme that consists of the ICSM which has  
8  
9 221 a broader focus beyond chronic diseases, both these interventions have similar  
10  
11 222 principles, standards and aims of ensuring that patients get quality patient-centric care  
12  
13 223 that achieves the desired health outcomes<sup>19-21</sup>. We envisage lessons learnt from an  
14  
15 224 evaluation of the ICDM model can be beneficial in the strengthening of implementation  
16  
17 225 of the ICRM programme.  
18

226

227

20 228 Interviews with the actors in the ICDM model implementation will provide information  
21  
22 229 on their perceptions and experiences with implementation and how contextual factors  
23  
24 230 have affected fidelity to the model's guidelines. This can improve comparability,  
25  
26 231 generalizability and replicability of the results of this study. Assessing the cost of  
27  
28 232 implementing the various activities of the ICDM model will then assist with planning  
29  
30 233 and budgeting, as well as inform scalability and sustainability of the model.  
31

234

32 235 Therefore, the **aim** of this study is to evaluate selected implementation outcomes of  
33  
34 236 the ICDM model: fidelity and implementation costs, and to assess the influence of  
35  
36 237 contextual factors on ICDM model implementation fidelity in two health districts where  
37  
38 238 the ICDM has been piloted, from two different provinces in order to better understand  
39  
40 239 the processes of successful implementation of the ICDM model and how the model  
41  
42 240 can be optimized. The **objectives** of the study are:

- 43 241 1. To assess the degree of fidelity in the implementation of the ICDM model  
44  
45 242 2. To evaluate the influence of contextual factors on the implementation fidelity of the  
46  
47 243 ICDM model  
48  
49 244 3. To estimate the implementation costs of the ICDM model  
50

245

246

## 52 247 **Methods and Analysis**

53 248

### 54 249 **Setting**

55 250

57 251 This study will be conducted from August 2018 to July 2019 in two health districts (Dr.  
58  
59 252 Kenneth Kaunda in North West Province and West Rand District in Gauteng) that were  
60  
253 the pilot sites for the ICDM model implementation. Both districts are within socio-

1  
2  
3 254 economic quantile four (1 is most deprived and 5 is least deprived), however  
4 255 comparing the North West to Gauteng province, poverty prevalence (33% vs. 27%)  
5 256 and informal housing ( 21% vs. 19%) are slightly higher in the North West Province<sup>31</sup>,  
6 257 <sup>32</sup>. The provincial HIV prevalence is 13.3% in North West Province and 12.4% in  
7 258 Gauteng<sup>33</sup>. The prevalence of hypertension is high (31%- 39.7%) in both districts, a  
8 259 reflection of large number of people accessing health services for chronic NCD<sup>31</sup>. The  
9 260 prevalence of diabetes in South Africa is 8.27% (2.6 million), and 31.9% among adults  
10 261 (20-79 years) with 1.2 million people with diabetes estimated to be undiagnosed<sup>34</sup>.  
11 262

## 18 263 **Theoretical Framework**

### 20 264 *Process Evaluation of Complex Interventions*

21 265 Process evaluation frameworks assist in understanding the functioning of a complex  
22 266 intervention by reviewing implementation processes and the influence of contextual  
23 267 factors<sup>35,36</sup>. A complex intervention implementation process has multiple components  
24 268 which interact to produce change, and or are difficult to implement and or target a  
25 269 number of organizational levels<sup>35,37</sup>. Process evaluation is therefore useful for  
26 270 assessing (Figure 3) fidelity (dose, adaptations, frequency and reach), clarifying the  
27 271 usual mechanisms and processes and identifying the impact of contextual factors on  
28 272 the variations in processes and outcomes<sup>38</sup>. A process evaluation framework will be  
29 273 applied in this study to evaluate whether the processes for implementing the  
30 274 intervention (the ICDM model) is being applied as intended according to the design  
31 275 (fidelity) of the intervention, and how contextual factors influence the implementation  
32 276 fidelity (Figure 4). The costs, quantity and quality of program activities provided and  
33 277 evaluating the generalizability of the results in other different contexts is important  
34 278 especially for a program that is already established<sup>38</sup>.  
35 279

## 36 280 **Study Design**

37 281 This is a process evaluation study using mixed methods to assess the degree of  
38 282 fidelity, costs and impact of context on the implementation fidelity of the ICDM model.  
39 283

## 40 284 **Objective-specific methodology**

41 285 **Fidelity assessment** will be carried out to review if implementation of the ICDM model  
42 286 adheres to content, coverage, frequency and duration as prescribed in the ICDM  
43 44 45 46 47 48 49 50 51 52 53 54 55 56 57 58 59 60

1  
2  
3 287 model manual in sixteen (8 in North West and 8 in Gauteng) clinics. As there are no  
4  
5 288 fidelity criteria in the literature that are suitable to adapt for assessing the ICDM model  
6  
7 289 implementation, we developed fidelity criteria based on the ICDM model guidelines<sup>16</sup>,  
8  
9 290 the ICRM programme monitoring tools<sup>21</sup> and published literature on the ICDM model<sup>18</sup>,  
10  
11 291 <sup>26, 28, 30</sup>. The basis of the criteria are the four (facility re-organization, clinical supportive  
12  
13 292 management, assisted self-management and strengthening of the support systems)  
14  
15 293 major components of the ICDM model<sup>16</sup>. The outlined prescribed activities are the  
16  
17 294 variables to be assessed on the implementation fidelity criteria. The expected outcome  
18  
19 295 of the fidelity criteria is to warrant that all the essential activities required for successful  
20  
21 296 implementation of the ICDM model have been captured. Each criterion under the four  
22  
23 297 major components will be listed as an item to be scored on the fidelity criteria. We will  
24  
25 298 assess the fidelity criteria in a pilot study, and finalize it on the basis of the results of  
26  
27 299 the pilot study. Sixteen clinics, from the twenty ICDM pilot clinics located in those  
28  
29 300 districts will be considered for inclusion if the clinic has been open and running without  
30  
31 301 any major interruptions (renovations, closures) in the last two years. At each clinic,  
32  
33 302 we will collect data using structured observations, review of facility records and  
34  
35 303 interviews with the healthcare workers (Table 1).  
36  
37 304

34  
35 305 **Contextual factors** (facility characteristics and characteristics of individuals and  
36  
37 306 teams) on fidelity will be examined in four clinics. Based on the degree of fidelity, **two**  
38  
39 307 **clinics**, one with a high, one with a low degree of fidelity will be selected each of the  
40  
41 308 two districts. The organizational contextual factors to be considered include  
42  
43 309 communication style, decision process and culture<sup>39</sup>. Individual level data for the  
44  
45 310 implementing teams will include demographics (age, gender, race, education level),  
46  
47 311 position role within the clinic, years in that role, their participation in the delivery of the  
48  
49 312 ICDM model. External (to the facility) context factors (socio-economic level, policies  
50  
51 313 and legislation) will not be evaluated in order to keep the study scope manageable.  
52  
53 314 We will use mixed-methods (interviews, facility assessments and culture surveys)  
54  
55 315 approach to assess the influence of context on implementation fidelity. We will conduct  
56  
57 316 qualitative interviews with thirty healthcare workers, purposively selected to represent  
58  
59 317 different cadres of staff members that implement and manage the ICDM model  
60  
318 intervention for more than six months (Table 1). The interviews will be done on a one-  
319  
to-one basis to minimize having group dynamics.

320

321 Participants' confidentiality will be protected at all times during the study and no  
322 electronic record will contain individual identifiers. A master list that contains the  
323 participants' identifiers will be kept in a separate lockable area. The results will also  
324 be presented in such a way that respondents cannot be identified.

325

326 **Costs:** The financial and economic costs of implementing the ICDM model from the  
327 health system perspective will be evaluated in the same four clinics. The health system  
328 implementation costs are an all-inclusive costing valuation that considers costs  
329 incurred by the providers of the service<sup>40</sup>. Assessing the implementation costs will be  
330 a partial economic evaluation as it will only focus on the costs of implementation and  
331 not the outcomes. The unit of implementation costs will be by activity of each of the  
332 major components of the ICDM model. Service level costs such as those pertaining to  
333 the development of the ICDM model will not be included as these costs were incurred  
334 in 2010/11 . The focus will be on post start-up annual costs required for the full  
335 implementation of the ICDM model in a typical year (Table 1). Both direct and indirect,  
336 and fixed and recurrent costs will be calculated.

337

338 Capital costs: Annualized equipment and capital costs will be calculated according to  
339 the volume being used for the ICDM model. Estimating annual costs will include  
340 adding up the acquisition, operation, maintenance and disposal costs.

341 Operational costs: In the financial documents review, key operational costs that we  
342 will check and categorize include human resources, office supplies and travel. Based  
343 on the useful life and the discount rate, an appropriate annualization factor will be  
344 determined. If there are any donations for program implementation (volunteers,  
345 healthcare workers not allocated to ICDM but assisting in service delivery, donated  
346 equipment or office supplies) they will be included. Medical and support staff labour  
347 costs will be calculated based on the full time equivalent, duration of involvement in  
348 the ICDM model implementation and the gross salary of the personnel.

349 A proportion of overhead costs of running the health facility like electricity, rent, water  
350 will be included in the implementation costs. Administrative costs at district and  
351 provincial level (which are beyond the facility) will not be included in the analysis.

352

1  
2  
3 353 *Patient and Public Involvement*: Previous research has shown that patients do not like  
4 354 some of the components of the ICDM model and that was the basis of the research  
5 355 question. Patients will not be enrolled in the study; however results will be shared with  
6 356 them through community and health facilities leadership.  
7  
8  
9

10 357

## 11 358 **Data Management and Analysis Plan**

12 359 The data will be collected using paper based questionnaires and later captured into  
13 360 an electronic database. There will be no identifying features (e.g. date of birth,  
14 361 addresses) in the database. The health facilities and healthcare workers that  
15 362 participated will be allocated a study number. Source documents will be safely kept  
16 363 and only accessible to study personnel. The data on costs will be manually entered  
17 364 into the CostIt software 2007<sup>41</sup> according to the provided major categories. CostIt  
18 365 software is a template designed to capture and automatically analyse cost data for  
19 366 different (hospital, PHC and programme) levels of the healthcare system<sup>41</sup>  
20  
21  
22  
23  
24  
25  
26  
27

28 367

29 368 Descriptive statistics (frequency, median, interquartile ranges, percentages) will be  
30 369 used to examine the general quantitative variables of the clinics, such as size, number  
31 370 of chronic patients, services offered, clinic team characteristics and overall functioning  
32 371 status. Following the evaluation, each clinic will receive a score for each of the fidelity  
33 372 criteria items. Item scores will be summed per component to give four overall ICDM  
34 373 component fidelity scores per facility. An overall ICDM model implementation fidelity  
35 374 score will be calculated per facility by summing the four component scores. The  
36 375 implementation fidelity scores will be summarized using descriptive statistics and  
37 376 compared between components, facilities and districts. The outcome of interest will be  
38 377 the degree of implementation fidelity.  
39  
40  
41  
42  
43  
44  
45

46 378

47 379 The experiences and perceptions of the healthcare workers from the interviews will be  
48 380 analysed with REDCap software for Likert scaled questions and using thematic  
49 381 content analysis for barriers and facilitators of implementation fidelity for qualitative  
50 382 data. The six steps recommended by Braun and Clarke<sup>42</sup> for thematic content analysis  
51 383 that will be followed: Familiarization, generating initial codes, searching for themes  
52 384 throughout the database, reviewing and naming themes and summarizing the  
53 385 findings<sup>42</sup>. Multi-variate analysis using STATA 14 econometric software will be used  
54 386 to assess the effect of various contextual factors on the implementation fidelity of the  
55  
56  
57  
58  
59  
60

387 ICDM model. The impact of both the organizational (case mix, financial flexibility and  
 388 culture) and implementing teams (work experience, cadre of HCW, training and  
 389 perceptions of ICDM) level factors on the degree of the ICDM model implementation  
 390 fidelity will be assessed. The initial analysis will include description of the sample,  
 391 followed by a bivariate analysis that includes t-tests and ANOVA to examine the  
 392 influence of contextual factors on implementation fidelity of the ICDM model.

393

394 Costs: Capital costs and other costs that have a life span of several years will be  
 395 annualized over the useful lifespan to get the equivalent annual costs. All costs will be  
 396 adjusted for inflation and discount. Equipment will be depreciated according to the  
 397 South African Accounting principles<sup>43</sup>. Sensitivity analyses will be conducted for other  
 398 possible variations in estimated costs. Sensitivity analyses will also be carried out to  
 399 explore different scenarios including size of clinic, degree of implementation fidelity  
 400 and other factors that could possibly affect costs based on literature.

401

402 *Table 1: Summary of study objectives, methods and expected outcomes for assessing the*  
 403 *fidelity, impact of contextual factors and costs of the ICDM model implementation*

404

|                                               | Objective                                                                                        | Methods                                                                                                                                                                                                                                                                                                                                                                                                          | Outcomes                                                                                                                                                                                                 |
|-----------------------------------------------|--------------------------------------------------------------------------------------------------|------------------------------------------------------------------------------------------------------------------------------------------------------------------------------------------------------------------------------------------------------------------------------------------------------------------------------------------------------------------------------------------------------------------|----------------------------------------------------------------------------------------------------------------------------------------------------------------------------------------------------------|
| Degree of Fidelity Assessment                 | To assess the degree of fidelity in the implementation of the ICDM model                         | Quantitative: Fidelity Evaluation in <b>16 ICDM model pilot PHC clinics</b> using the Fidelity criteria scoring checklist template.<br>Data Sources: Key informants interviews, structured observations and review of facility records                                                                                                                                                                           | Degree of the ICDM model implementation fidelity for each activity and component of the ICDM model and overall scores by clinic and district.                                                            |
| Impact of contextual factors on ICDM fidelity | To evaluate the influence of contextual factors on the implementation fidelity of the ICDM model | Qualitative interviews with <b>30 HCW</b> in four (two per district) facilities using structured interview guides and organizational culture survey.<br>Quantitative data to assess association between contextual factors and degree of ICDM model fidelity                                                                                                                                                     | Health workers' perceptions of contextual factors that influence implementation fidelity of the ICDM model<br>Establish influence of contextual factors on the degree ICDM model implementation fidelity |
| Costs of Implementing the ICDM model          | To estimate the implementation costs of the ICDM model                                           | Ingredient approach to health system costs in <b>four PHC clinics</b> – two facilities per district using The World Health Organization CostIt software 2007.<br>Data sources: Budgets, key informants interviews, direct observations and literature search.<br>Annualize capital costs<br>Adjust all costs for inflation and discount<br>Develop a cost profile for providing each component of the ICDM model | The cost of implementing each of the components of the ICDM model<br>Sensitivity analysis to determine cost drivers in the implementation of the ICDM model.                                             |

## 405 **Ethics and Dissemination**

406

407 *Ethical conduct of the study:* This study has been approved by the University of Cape  
408 Town (Ref: 127/2018) and University of the Witwatersrand (Ref: R14/49) Human  
409 Research ethics committees. Approvals have also been received from the Gauteng  
410 and the North West Provincial departments of health. The participants for the  
411 interviews will be consented individually prior to taking part in the study.

412

413 *Results Dissemination:* The results of this study will be shared with the various  
414 stakeholders to inform the implementation of the ICDM model in South Africa and other  
415 models of integrated care. Brief summary of results will be presented to the Provincial  
416 and districts DOH. The full results will be presented at local research days in each  
417 province and district. Facility managers and local clinic staff that participated in the  
418 study will be given feedback on the outcomes of the study. The results will also be  
419 presented through publications and conference presentations to enhance scientific  
420 knowledge. Authorship will be determined by substantial contributions to the study  
421 according to the recommendations for the conduct, reporting and publication of  
422 research in medical journals. Once the data collection and cleaning is complete, it will  
423 be made open and publicly accessible.

424

425

426 **Conclusion:** Many health systems are challenged with increased demand for  
427 healthcare for chronic diseases. Despite this service need, there is minimal integration  
428 of services for the management of chronic diseases resulting in inefficiencies in  
429 service delivery, high costs and poor health outcomes. The ICDM model has been  
430 developed to address this challenge, the success of which will be influenced by the  
431 degree to which the model is accurately implemented. This highlights the need for data  
432 to assess the degree of fidelity to the ICDM model intervention, and for data that  
433 explores how fidelity of implementation is affected by contextual factors. Data  
434 generated from this study will inform integration of chronic care services at the PHC  
435 level, and scalability of the ICDM model, of relevance in South Africa and other low  
436 and middle-income countries increasingly facing a growing tide of chronic disease  
437 multimorbidity.

438



## References

1. Kim DJ., Westfall AO., Chamot E. Multimorbidity patterns in HIV-infected patients: the role of obesity in chronic disease clustering. *Immune Defic Syndr* 2012; 61:600-5.
2. The World Bank. Human Development Network. The growing danger of non-communicable diseases. Acting now to reverse course. 2011.
3. Mbanya J., Ramiaya K. Diabetes Mellitus. In: Jamison D. T., Feachem R. G., Makgoba M. W., editors. *Disease and Mortality in Sub-Saharan Africa*. Washington DC: World Bank; 2006.
4. Vorster HH., Venter CS., Wissing MP., Margetts BM. The nutrition and health transition in the North West Province of South Africa: a review of the THUSA study. *Publ Health Nutr* 2005; 8:480 -90.
5. Steyn K., Kazenellenbogen JM., Lombard CJ., Bourne LT. Urbanization and the risk for chronic diseases of lifestyle in the black population of the Cape Peninsula, South Africa. *J Cardiovasc Risk* 1997; 4:135 - 42.
6. Oni T, Unwin N. Why the communicable/non-communicable disease dichotomy is problematic for public health control strategies: implications of multimorbidity for health systems in an era of health transition. *International Health* 2015.
7. Bertram MY., Jaswal AV., Wyk VP., Levitte NS., Hofman KJ. The non-fatal disease burden caused by Type 2 Diabetes in South Africa. *Global Health Action*. 2013; 6
8. France EF., Wyke S., Gunn JM., Mair FS., McLean G., Mercer S. Multimorbidity in primary care: a systematic review of prospective cohort studies. *Br J Gen Pract* 2012; 62:e297-e307.
9. Prados-Torres A, Calderón-Larrañaga A., Hanco-Saavedra J, Poblador-Plou B, van den Akker M. Multimorbidity patterns: a systematic review. *Journal of Clinical Epidemiology* 2014; 67:254-66.
10. Statistics South Africa. Mortality and causes of death in South Africa Findings from death notification Statistics South Africa, Pretoria, South Africa 2014.
11. UNAIDS. HIV and AIDS estimates 2015.
12. Oni T, Youngblood E, Boule A, McGrath N, Wilkinson RJ, Levitt NS. Patterns of HIV, TB, and non-communicable disease multi-morbidity in peri-urban South Africa-a cross sectional study. *BMC Infect Dis*. 2015; 15:s12879-015.
13. Department of Health Free State. The Free State Department of Health: Annual Performance Plan 2015/2016 2016.
14. Nuño R., Coleman K., Bengoa R., Sauto R. Integrated care for chronic conditions: the contribution of the ICCF Framework. *Health Policy* 2012; 105:55-64.
15. World Health Organization. Innovative care for chronic conditions: Building Blocks for Action 2013: Available from: <http://www.who.int/chp/knowledge/publications/icccreport/en/>.
16. National Department of Health of South Africa. Integrated Chronic Disease Management Manual, A step-by-step guide for implementation. South Africa 2012.
17. Proctor EK, Powell BJ, McMillen JC. Implementation strategies: recommendations for specifying and reporting. *Implement Sci* 2013; 8:1748-5908.
18. Mahomed OH, Asmall S, J. Development and implementation of an integrated chronic disease model in South Africa: lessons in the management of change through improving the quality of clinical practice. *Int J of Integr Care* 2015; 15

- 1  
2  
3 485 19. Gray A, Vawda Y, Padarath A, King J, English R. Health Policy and Legislation. In:  
4 486 Padarath A, King J, R E, editors. South African Health Review. Durban, South Africa: Health  
5 487 Systems Trust; 2015.
- 7 488 20. Hunter JR CT, Asmall S, Tucker JM, Ravhengani NM, Mokgalagadi Y. The Ideal Clinic  
8 489 in South Africa: progress and challenges in implementation. In: Padarath A, Barron P, editors  
9 490 South Africa Health Review. Durban, South Africa: Health System Trust2017.
- 11 491 21. Department of Health. Integrated Clinical Services Management Manual. Republic of  
12 492 South Africa2016.
- 13 493 22. Gabert R, Wollum A, Nyembezi A, Petersen Z, Phillips B, Reitsma M, et al. The need  
14 494 for integrated chronic care in South Africa: preliminary lessons from the HealthRise  
15 495 program. 21st International AIDS Conference; Durban, South Africa2016.
- 17 496 23. Aantjes C, Quinlan T, Bunders J. Integration of community home based care  
18 497 programmes within national primary health care revitalisation strategies in Ethiopia,  
19 498 Malawi, South-Africa and Zambia: a comparative assessment. *Globalization and health*.  
20 499 2014; 10:85.
- 22 500 24. Maimela E, Geertruyden JP, Alberts M, Modjadji SE, Meulemans H, Fraeyman J, et al.  
23 501 The perceptions and perspectives of patients and health care providers on chronic diseases  
24 502 management in rural South Africa: a qualitative study. *BMC Health Serv Res*. 2015; 15
- 25 503 25. David H., Peters NT., Tran TA. Implementation research in health: a practical guide.  
26 504 Alliance for Health Policy and Systems, World Health Organization. 2013.
- 28 505 26. Ameh S, Klipstein-Grobusch K, D'Ambruoso L, Kahn K, Tollman SM, Gómez-Olivé X.  
29 506 Effectiveness of an integrated chronic disease management model in improving patients'  
30 507 CD4 count and blood pressure in a rural South African setting: a controlled interrupted time  
31 508 series analysis. 21st International AIDS Conference; Durban South Africa2016.
- 33 509 27. Mahomed OH, Naidoo S, Asmall S, Taylor M. Improving the quality of nurse clinical  
34 510 documentation for chronic patients at primary care clinics: A multifaceted intervention.  
35 511 *Curationis*. 2015; 38.
- 36 512 28. Ameh S, Klipstein-Grobusch K, D'Ambruoso L, Kahn K, Tollman SM, Gómez-Olivé X.  
37 513 Quality of integrated chronic disease care in rural South Africa:User and provider  
38 514 perspective. 21st International AIDS Conference; Durban South Africa2016.
- 40 515 29. Carroll C., Patterson M., Wood S., Booth A., Rick J., Balain S. A conceptual framework  
41 516 for implementation fidelity. *Implement Sci* 2007; 2
- 43 517 30. Mahomed OH, Asmall S, Freeman M, J. An integrated chronic disease management  
44 518 model: a diagonal approach to health system strengthening in South Africa. *J of Health Care*  
45 519 *Poor Underserved* 2014; 25:1723-9.
- 46 520 31. Massyn N, Peer N, Padarath A, Barron P, Day C. District Health Barometer 2014/15.  
47 521 Durban, South Africa: Health Systems Trust; 2015.
- 48 522 32. Day C, Gray A. Health and related indicators. South Africa: Health Systems Trust2016.
- 49 523 33. Shisana O, Rehle T, Simbayi LC, Zuma K, Jooste S, Zungu N, et al. South African  
50 524 National HIV Prevalence, Incidence and Behaviour Survey, 2012. South Africa2012.
- 52 525 34. I. D. F. International Diabetes Federation. Atlas sixth edition IDF Brussels. 2013.
- 53 526 35. Green H. Use of theoretical and conceptual frameworks in qualitative research.  
54 527 *Nurse Res* 2014; 21:34-8.
- 56 528 36. Moore G, Audrey S, Barker M, Bond L, et. al. Process Evaluation of Complex  
57 529 Interventions. United Kingdom Medical Research Council (MRC) Guidance: UK MRC2008.

- 1  
2  
3 530 37. Craig P., Dieppe P., Macintyre S., Michie S., Nazareth I., Petticrew M. Medical  
4 531 Research Council Guidance:Developing and evaluating complex interventions the new  
5 532 Medical Research Council guidance BMJ 2008; 337  
6  
7 533 38. Moore GF, Audrey S, Barker M, Bond L, Bonell C, Hardeman W, et al. Process  
8 534 evaluation of complex interventions: Medical Research Council guidance. BMJ 2015;  
9 535 350:h1258.  
10  
11 536 39. Sanson-Fisher RW. Diffusion of innovation theory for clinical change. Medical Journal  
12 537 of Australia. 2014; 6.  
13 538 40. Rabarison KM, Bish CL, Massoudi MS, Giles WH. Economic Evaluation Enhances  
14 539 Public Health Decision Making. Frontiers in public health. 2015; 3:164.  
15 540 41. Taghreed A, Moses A, David E. CostIt software. World Health Organization [serial on  
16 541 the Internet]. 2007.  
17 542 42. Mojtaba Vaismoradi, Hannele Turunen, Terese Bondas. Content analysis and  
18 543 thematic analysis: Implications for conducting a qualitative descriptive study. Nursing and  
19 544 Health Sciences. 2013; 15:398 - 405.  
20  
21 545 43. South African Revenue Service. Income Tax Act No. 58 of 1962. Binding General  
22 546 Ruling (Income Tax): No. 8, Wear-and-tear or depreciation allowance. South Africa, 2012.  
23 547  
24  
25 548  
26 549  
27  
28  
29  
30  
31  
32  
33  
34  
35  
36  
37  
38  
39  
40  
41  
42  
43  
44  
45  
46  
47  
48  
49  
50  
51  
52  
53  
54  
55  
56  
57  
58  
59  
60

1  
2  
3  
4  
5  
6  
7  
8  
9  
10  
11  
12  
13  
14  
15  
16  
17  
18  
19  
20  
21  
22  
23  
24  
25  
26  
27  
28  
29  
30  
31  
32  
33  
34  
35  
36  
37  
38  
39  
40  
41  
42  
43  
44  
45  
46  
47  
48  
49  
50  
51  
52  
53  
54  
55  
56  
57  
58  
59  
60

550  
551 **Acknowledgements:** We would like to acknowledge the people that have reviewed  
552 this protocol and provided feedback: Leslie London, Edina Sinanovic, Maylene Shung  
553 King and South African MRC Self-Initiated Research Grant division.

554  
555 **Funding Statement:** The proposed study outlined in this protocol will be supported  
556 by the South African Medical Research Council under a Self-Initiated Research Grant  
557 (ID:494184). The views and opinions expressed are those of the author(s) and do not  
558 necessarily represent the official views of the SA MRC. The sponsor appointed  
559 reviewers have critically assessed the protocol and requested some changes to be  
560 done prior to submission to ethics. The sponsor will have no role in data collection,  
561 analysis or reporting.

562  
563 **Author Statement:** LL was involved in the conception, design literature review and  
564 writing. OA, MK and TO have contributed to the conception, design and critical review  
565 of the manuscript.

566  
567 **Conflict of Interest:** The authors have no conflict of interest to declare.

568  
569 **Ethical Issues:** The protocol has been approved by the University of Cape Town and  
570 University of the Witwatersrand Human Research ethics committees. Any changes  
571 required, will have to be submitted to both ethics committees.

572  
573 **Word Count:** 3994

574

575

## 576 **Figures and Tables**

### 577 **Figures**

578 *Figure 1: Map of South Africa with the ICDM model pilot sites highlighted*

579

580 *Figure 2: Integrated Chronic Disease Management Model<sup>16</sup>*

581

582 *Figure 3: The Process Evaluation framework for complex interventions<sup>38</sup>*

583

584 *Figure 4: Modified Process Evaluation Framework for assessing the fidelity and cost  
585 of the ICDM model implementation*

586

### 587 **Tables**

588 *Table 2: Summary of study objectives, methods and expected outcomes for assessing  
589 the fidelity, impact of contextual factors and costs of the ICDM model implementation*

590

591

1  
2  
3  
4  
5  
6  
7  
8  
9  
10  
11  
12  
13  
14  
15  
16  
17  
18  
19  
20  
21  
22  
23  
24  
25  
26  
27  
28  
29  
30  
31  
32  
33  
34  
35  
36  
37  
38  
39  
40  
41  
42  
43  
44  
45  
46  
47  
48  
49  
50  
51  
52  
53  
54  
55  
56  
57  
58  
59  
60

Figure 1: Map of South Africa with the ICDM model pilot sites highlighted  
Source: <https://d-maps.com>

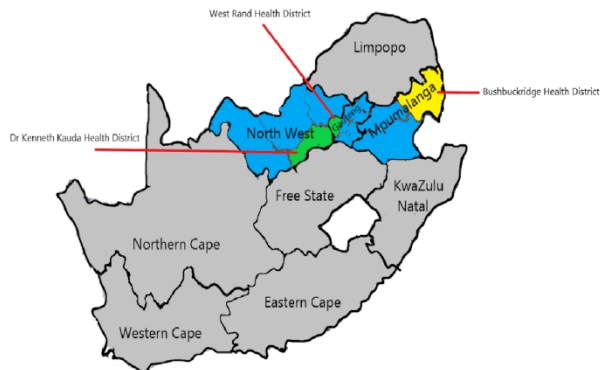

Figure 1: Map of South Africa with the ICDM model pilot sites highlighted  
209x297mm (300 x 300 DPI)

1  
2  
3  
4  
5  
6  
7  
8  
9  
10  
11  
12  
13  
14  
15  
16  
17  
18  
19  
20  
21  
22  
23  
24  
25  
26  
27  
28  
29  
30  
31  
32  
33  
34  
35  
36  
37  
38  
39  
40  
41  
42  
43  
44  
45  
46  
47  
48  
49  
50  
51  
52  
53  
54  
55  
56  
57  
58  
59  
60

Figure 2: Integrated Chronic Disease Management Model<sup>21</sup>

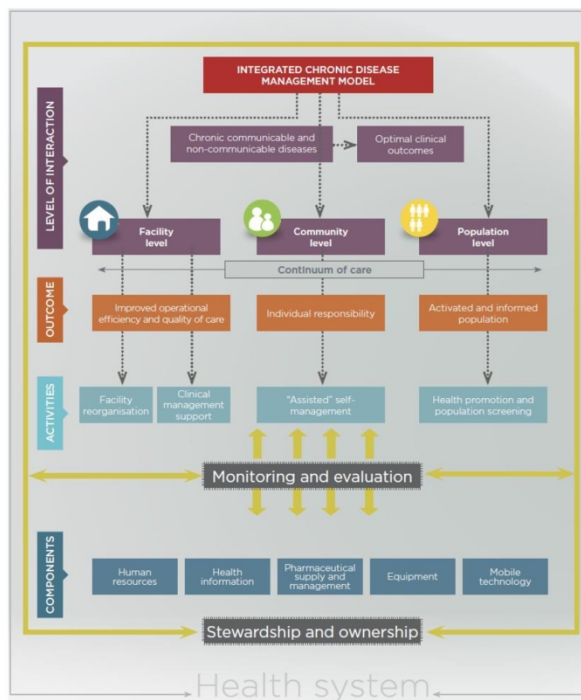

Figure 2: Integrated Chronic Disease Management Model 21

209x297mm (200 x 200 DPI)

1  
2  
3  
4  
5  
6  
7  
8  
9  
10  
11  
12  
13  
14  
15  
16  
17  
18  
19  
20  
21  
22  
23  
24  
25  
26  
27  
28  
29  
30  
31  
32  
33  
34  
35  
36  
37  
38  
39  
40  
41  
42  
43  
44  
45  
46  
47  
48  
49  
50  
51  
52  
53  
54  
55  
56  
57  
58  
59  
60

Figure 3: The Process Evaluation framework for complex interventions<sup>38</sup>



Figure 3: The Process Evaluation framework for complex interventions 38

90x127mm (300 x 300 DPI)

1  
2  
3  
4  
5  
6  
7  
8  
9  
10  
11  
12  
13  
14  
15  
16  
17  
18  
19  
20  
21  
22  
23  
24  
25  
26  
27  
28  
29  
30  
31  
32  
33  
34  
35  
36  
37  
38  
39  
40  
41  
42  
43  
44  
45  
46  
47  
48  
49  
50  
51  
52  
53  
54  
55  
56  
57  
58  
59  
60

Figure 4: Modified Process Evaluation Framework for assessing the fidelity and cost of the ICDM model implementation



Figure 4: Modified Process Evaluation Framework for assessing the fidelity and cost of the ICDM model implementation

139x198mm (300 x 300 DPI)



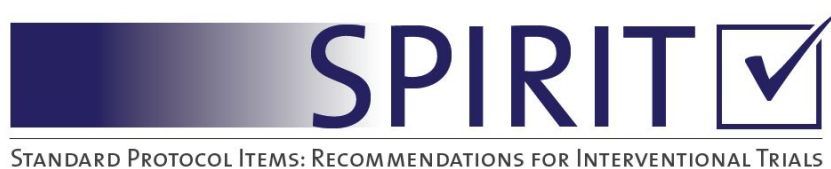

SPIRIT 2013 Checklist: Recommended items to address in a clinical trial protocol and related documents\*

| Section/item                      | Item No | Description                                                                                                                                                                                                                                                                                        |
|-----------------------------------|---------|----------------------------------------------------------------------------------------------------------------------------------------------------------------------------------------------------------------------------------------------------------------------------------------------------|
| <b>Administrative information</b> |         |                                                                                                                                                                                                                                                                                                    |
| Title                             | 1       | Descriptive title identifying the study design, population, interventions, and, if applicable, trial acronym ✓ - pg. 1                                                                                                                                                                             |
| Trial registration                | 2a      | Trial identifier and registry name. If not yet registered, name of intended registry – <b>N/A</b>                                                                                                                                                                                                  |
|                                   | 2b      | All items from the World Health Organization Trial Registration Data Set. – <b>N/A</b>                                                                                                                                                                                                             |
| Protocol version                  | 3       | Date and version identifier - ✓ - pg.1                                                                                                                                                                                                                                                             |
| Funding                           | 4       | Sources and types of financial, material, and other support ✓ - pg.18                                                                                                                                                                                                                              |
| Roles and responsibilities        | 5a      | Names, affiliations, and roles of protocol contributors - ✓ - pg.18                                                                                                                                                                                                                                |
|                                   | 5b      | Name and contact information for the trial sponsor <b>N/A</b>                                                                                                                                                                                                                                      |
|                                   | 5c      | Role of study sponsor and funders, if any, in study design; collection, management, analysis, and interpretation of data; writing of the report; and the decision to submit the report for publication, including whether they will have ultimate authority over any of these activities ✓ - pg.18 |
|                                   | 5d      | Composition, roles, and responsibilities of the coordinating centre, steering committee, endpoint adjudication committee, data management team, and other individuals or groups overseeing the trial, if applicable (see Item 21a for data monitoring committee) <b>N/A</b>                        |
| <b>Introduction</b>               |         |                                                                                                                                                                                                                                                                                                    |
| Background and rationale          | 6a      | Description of research question and justification for undertaking the trial, including summary of relevant studies (published and unpublished) examining benefits and harms for each intervention ✓ - pg. 2-4                                                                                     |
|                                   | 6b      | Explanation for choice of comparators – <b>N/A</b>                                                                                                                                                                                                                                                 |
| Objectives                        | 7       | Specific objectives or hypotheses ✓ - pg. 7                                                                                                                                                                                                                                                        |

1  
2  
3  
4  
5  
6  
7  
8  
9  
10  
11  
12  
13  
14  
15  
16  
17  
18  
19  
20  
21  
22  
23  
24  
25  
26  
27  
28  
29  
30  
31  
32  
33  
34  
35  
36  
37  
38  
39  
40  
41  
42  
43  
44  
45  
46  
47  
48  
49  
50  
51  
52  
53  
54  
55  
56  
57  
58  
59  
60

|              |   |                                                                                                                                                                                                                        |
|--------------|---|------------------------------------------------------------------------------------------------------------------------------------------------------------------------------------------------------------------------|
| Trial design | 8 | Description of trial design including type of trial (eg, parallel group, crossover, factorial, single group), allocation ratio, and framework (eg, superiority, equivalence, noninferiority, exploratory) – <b>N/A</b> |
|--------------|---|------------------------------------------------------------------------------------------------------------------------------------------------------------------------------------------------------------------------|

### **Methods: Participants, interventions, and outcomes**

|               |   |                                                                                                                                                                                                |
|---------------|---|------------------------------------------------------------------------------------------------------------------------------------------------------------------------------------------------|
| Study setting | 9 | Description of study settings (eg, community clinic, academic hospital) and list of countries where data will be collected. Reference to where list of study sites can be obtained ✓ - pg. 7-8 |
|---------------|---|------------------------------------------------------------------------------------------------------------------------------------------------------------------------------------------------|

|                      |    |                                                                                                                                                                                                           |
|----------------------|----|-----------------------------------------------------------------------------------------------------------------------------------------------------------------------------------------------------------|
| Eligibility criteria | 10 | Inclusion and exclusion criteria for participants. If applicable, eligibility criteria for study centres and individuals who will perform the interventions (eg, surgeons, psychotherapists) ✓ - pg. 9-10 |
|----------------------|----|-----------------------------------------------------------------------------------------------------------------------------------------------------------------------------------------------------------|

|               |     |                                                                                                                                  |
|---------------|-----|----------------------------------------------------------------------------------------------------------------------------------|
| Interventions | 11a | Interventions for each group with sufficient detail to allow replication, including how and when they will be administered – N/A |
|---------------|-----|----------------------------------------------------------------------------------------------------------------------------------|

|  |     |                                                                                                                                                                                                      |
|--|-----|------------------------------------------------------------------------------------------------------------------------------------------------------------------------------------------------------|
|  | 11b | Criteria for discontinuing or modifying allocated interventions for a given trial participant (eg, drug dose change in response to harms, participant request, or improving/worsening disease) - N/A |
|--|-----|------------------------------------------------------------------------------------------------------------------------------------------------------------------------------------------------------|

|  |     |                                                                                                                                                         |
|--|-----|---------------------------------------------------------------------------------------------------------------------------------------------------------|
|  | 11c | Strategies to improve adherence to intervention protocols, and any procedures for monitoring adherence (eg, drug tablet return, laboratory tests) - N/A |
|--|-----|---------------------------------------------------------------------------------------------------------------------------------------------------------|

|  |     |                                                                                                     |
|--|-----|-----------------------------------------------------------------------------------------------------|
|  | 11d | Relevant concomitant care and interventions that are permitted or prohibited during the trial – N/A |
|--|-----|-----------------------------------------------------------------------------------------------------|

|          |    |                                                                                                                                                                                                                                                                                                                                                                                                 |
|----------|----|-------------------------------------------------------------------------------------------------------------------------------------------------------------------------------------------------------------------------------------------------------------------------------------------------------------------------------------------------------------------------------------------------|
| Outcomes | 12 | Primary, secondary, and other outcomes, including the specific measurement variable (eg, systolic blood pressure), analysis metric (eg, change from baseline, final value, time to event), method of aggregation (eg, median, proportion), and time point for each outcome. Explanation of the clinical relevance of chosen efficacy and harm outcomes is strongly recommended ✓ - pg. 11 – 12. |
|----------|----|-------------------------------------------------------------------------------------------------------------------------------------------------------------------------------------------------------------------------------------------------------------------------------------------------------------------------------------------------------------------------------------------------|

|                      |    |                                                                                                                                                                                      |
|----------------------|----|--------------------------------------------------------------------------------------------------------------------------------------------------------------------------------------|
| Participant timeline | 13 | Time schedule of enrolment, interventions (including any run-ins and washouts), assessments, and visits for participants. A schematic diagram is highly recommended (see Figure) N/A |
|----------------------|----|--------------------------------------------------------------------------------------------------------------------------------------------------------------------------------------|

|             |    |                                                                                                                                                                                             |
|-------------|----|---------------------------------------------------------------------------------------------------------------------------------------------------------------------------------------------|
| Sample size | 14 | Estimated number of participants needed to achieve study objectives and how it was determined, including clinical and statistical assumptions supporting any sample size calculations – N/A |
|-------------|----|---------------------------------------------------------------------------------------------------------------------------------------------------------------------------------------------|

|             |    |                                                                                     |
|-------------|----|-------------------------------------------------------------------------------------|
| Recruitment | 15 | Strategies for achieving adequate participant enrolment to reach target sample size |
|-------------|----|-------------------------------------------------------------------------------------|

### **Methods: Assignment of interventions (for controlled trials) N/A**

Allocation:

|    |                |     |                                                                         |
|----|----------------|-----|-------------------------------------------------------------------------|
| 1  |                |     |                                                                         |
| 2  | Sequence       | 16a | Method of generating the allocation sequence (eg, computer-             |
| 3  | generation     |     | generated random numbers), and list of any factors for stratification.  |
| 4  |                |     | To reduce predictability of a random sequence, details of any planned   |
| 5  |                |     | restriction (eg, blocking) should be provided in a separate document    |
| 6  |                |     | that is unavailable to those who enrol participants or assign           |
| 7  |                |     | interventions                                                           |
| 8  |                |     |                                                                         |
| 9  |                |     |                                                                         |
| 10 | Allocation     | 16b | Mechanism of implementing the allocation sequence (eg, central          |
| 11 | concealment    |     | telephone; sequentially numbered, opaque, sealed envelopes),            |
| 12 | mechanism      |     | describing any steps to conceal the sequence until interventions are    |
| 13 |                |     | assigned                                                                |
| 14 |                |     |                                                                         |
| 15 | Implementation | 16c | Who will generate the allocation sequence, who will enrol participants, |
| 16 |                |     | and who will assign participants to interventions                       |
| 17 |                |     |                                                                         |
| 18 | Blinding       | 17a | Who will be blinded after assignment to interventions (eg, trial        |
| 19 | (masking)      |     | participants, care providers, outcome assessors, data analysts), and    |
| 20 |                |     | how                                                                     |
| 21 |                |     |                                                                         |
| 22 |                |     |                                                                         |
| 23 |                | 17b | If blinded, circumstances under which unblinding is permissible, and    |
| 24 |                |     | procedure for revealing a participant's allocated intervention during   |
| 25 |                |     | the trial                                                               |
| 26 |                |     |                                                                         |
| 27 |                |     |                                                                         |

### Methods: Data collection, management, and analysis

|    |                 |     |                                                                          |
|----|-----------------|-----|--------------------------------------------------------------------------|
| 28 |                 |     |                                                                          |
| 29 |                 |     |                                                                          |
| 30 | Data collection | 18a | Plans for assessment and collection of outcome, baseline, and other      |
| 31 | methods         |     | trial data, including any related processes to promote data quality (eg, |
| 32 |                 |     | duplicate measurements, training of assessors) and a description of      |
| 33 |                 |     | study instruments (eg, questionnaires, laboratory tests) along with      |
| 34 |                 |     | their reliability and validity, if known. Reference to where data        |
| 35 |                 |     | collection forms can be found, if not in the protocol ✓ - pg. 11-12      |
| 36 |                 |     |                                                                          |
| 37 |                 |     |                                                                          |
| 38 |                 | 18b | Plans to promote participant retention and complete follow-up,           |
| 39 |                 |     | including list of any outcome data to be collected for participants who  |
| 40 |                 |     | discontinue or deviate from intervention protocols – N/A                 |
| 41 |                 |     |                                                                          |
| 42 | Data            | 19  | Plans for data entry, coding, security, and storage, including any       |
| 43 | management      |     | related processes to promote data quality (eg, double data entry;        |
| 44 |                 |     | range checks for data values). Reference to where details of data        |
| 45 |                 |     | management procedures can be found, if not in the protocol ✓ - pg.       |
| 46 |                 |     | 11-12                                                                    |
| 47 |                 |     |                                                                          |
| 48 |                 |     |                                                                          |
| 49 | Statistical     | 20a | Statistical methods for analysing primary and secondary outcomes.        |
| 50 | methods         |     | Reference to where other details of the statistical analysis plan can be |
| 51 |                 |     | found, if not in the protocol - ✓ - pg. 11-12                            |
| 52 |                 |     |                                                                          |
| 53 |                 |     |                                                                          |
| 54 |                 | 20b | Methods for any additional analyses (eg, subgroup and adjusted           |
| 55 |                 |     | analyses) ✓ - pg. 11 -12                                                 |
| 56 |                 |     |                                                                          |
| 57 |                 | 20c | Definition of analysis population relating to protocol non-adherence     |
| 58 |                 |     | (eg, as randomised analysis), and any statistical methods to handle      |
| 59 |                 |     | missing data (eg, multiple imputation) N/A                               |
| 60 |                 |     |                                                                          |

**Methods: Monitoring**

|                                                                                                                               |                 |     |                                                                                                                                                                                                                                                                                                                                             |
|-------------------------------------------------------------------------------------------------------------------------------|-----------------|-----|---------------------------------------------------------------------------------------------------------------------------------------------------------------------------------------------------------------------------------------------------------------------------------------------------------------------------------------------|
| 1<br>2<br>3<br>4<br>5<br>6<br>7<br>8<br>9<br>10<br>11<br>12<br>13<br>14<br>15<br>16<br>17<br>18<br>19<br>20<br>21<br>22<br>23 | Data monitoring | 21a | Composition of data monitoring committee (DMC); summary of its role and reporting structure; statement of whether it is independent from the sponsor and competing interests; and reference to where further details about its charter can be found, if not in the protocol. Alternatively, an explanation of why a DMC is not needed - N/A |
|                                                                                                                               |                 | 21b | Description of any interim analyses and stopping guidelines, including who will have access to these interim results and make the final decision to terminate the trial – N/A                                                                                                                                                               |
|                                                                                                                               | Harms           | 22  | Plans for collecting, assessing, reporting, and managing solicited and spontaneously reported adverse events and other unintended effects of trial interventions or trial conduct                                                                                                                                                           |
|                                                                                                                               | Auditing        | 23  | Frequency and procedures for auditing trial conduct, if any, and whether the process will be independent from investigators and the sponsor                                                                                                                                                                                                 |

**Ethics and dissemination**

|                                                                                                                                                                                                                            |                               |     |                                                                                                                                                                                                                                            |
|----------------------------------------------------------------------------------------------------------------------------------------------------------------------------------------------------------------------------|-------------------------------|-----|--------------------------------------------------------------------------------------------------------------------------------------------------------------------------------------------------------------------------------------------|
| 24<br>25<br>26<br>27<br>28<br>29<br>30<br>31<br>32<br>33<br>34<br>35<br>36<br>37<br>38<br>39<br>40<br>41<br>42<br>43<br>44<br>45<br>46<br>47<br>48<br>49<br>50<br>51<br>52<br>53<br>54<br>55<br>56<br>57<br>58<br>59<br>60 | Research ethics approval      | 24  | Plans for seeking research ethics committee/institutional review board (REC/IRB) approval ✓ - pg. 1                                                                                                                                        |
|                                                                                                                                                                                                                            | Protocol amendments           | 25  | Plans for communicating important protocol modifications (eg, changes to eligibility criteria, outcomes, analyses) to relevant parties (eg, investigators, REC/IRBs, trial participants, trial registries, journals, regulators) ✓ - pg. 1 |
|                                                                                                                                                                                                                            | Consent or assent             | 26a | Who will obtain informed consent or assent from potential trial participants or authorised surrogates, and how (see Item 32) N/A                                                                                                           |
|                                                                                                                                                                                                                            |                               | 26b | Additional consent provisions for collection and use of participant data and biological specimens in ancillary studies, if applicable N/A                                                                                                  |
|                                                                                                                                                                                                                            | Confidentiality               | 27  | How personal information about potential and enrolled participants will be collected, shared, and maintained in order to protect confidentiality before, during, and after the trial ✓ - pg. 11                                            |
|                                                                                                                                                                                                                            | Declaration of interests      | 28  | Financial and other competing interests for principal investigators for the overall trial and each study site ✓ - pg. 1                                                                                                                    |
|                                                                                                                                                                                                                            | Access to data                | 29  | Statement of who will have access to the final trial dataset, and disclosure of contractual agreements that limit such access for investigators ✓ - pg. 1                                                                                  |
|                                                                                                                                                                                                                            | Ancillary and post-trial care | 30  | Provisions, if any, for ancillary and post-trial care, and for compensation to those who suffer harm from trial participation -N/A                                                                                                         |

- 1  
2  
3  
4  
5  
6  
7  
8  
9  
10  
11  
12  
13  
14  
15
- |                         |     |                                                                                                                                                                                                                                                                                                   |
|-------------------------|-----|---------------------------------------------------------------------------------------------------------------------------------------------------------------------------------------------------------------------------------------------------------------------------------------------------|
| Dissemination<br>policy | 31a | Plans for investigators and sponsor to communicate trial results to participants, healthcare professionals, the public, and other relevant groups (eg, via publication, reporting in results databases, or other data sharing arrangements), including any publication restrictions<br>✓ - pg. 12 |
|                         | 31b | Authorship eligibility guidelines and any intended use of professional writers - ✓ - pg. 13                                                                                                                                                                                                       |
|                         | 31c | Plans, if any, for granting public access to the full protocol, participant-level dataset, and statistical code ✓ - pg. 13                                                                                                                                                                        |

## 16 Appendices

- 17  
18  
19  
20  
21  
22  
23  
24
- |                               |    |                                                                                                                                                                                                      |
|-------------------------------|----|------------------------------------------------------------------------------------------------------------------------------------------------------------------------------------------------------|
| Informed consent<br>materials | 32 | Model consent form and other related documentation given to participants and authorised surrogates – Appendix 1                                                                                      |
| Biological<br>specimens       | 33 | Plans for collection, laboratory evaluation, and storage of biological specimens for genetic or molecular analysis in the current trial and for future use in ancillary studies, if applicable – N/A |

---

25 \*It is strongly recommended that this checklist be read in conjunction with the SPIRIT 2013  
26 Explanation & Elaboration for important clarification on the items. Amendments to the  
27 protocol should be tracked and dated. The SPIRIT checklist is copyrighted by the SPIRIT  
28 Group under the Creative Commons "[Attribution-NonCommercial-NoDerivs 3.0 Unported](https://creativecommons.org/licenses/by-nc-nd/3.0/)"  
29 license.  
30  
31  
32  
33  
34  
35  
36  
37  
38  
39  
40  
41  
42  
43  
44  
45  
46  
47  
48  
49  
50  
51  
52  
53  
54  
55  
56  
57  
58  
59  
60
